# Supplementary material for: DNA Methylation Signatures in Paired Placenta and Umbilical Cord Samples: Relationship with Maternal Pregestational Body Mass Index and Offspring Metabolic Outcomes
Source: MDPI journal article supplement (doi:10.3390/biomedicines12020301), 2024-01-27
Supplement: s1 [file s1]

**Supplementary Table S1:** Pyrosequencing primers and PCR conditions

| Gene                 |     | Primers                                     | Annealing temperature (°C) | Fragment size (bp) |
|----------------------|-----|---------------------------------------------|----------------------------|--------------------|
| <i><b>SLC2A8</b></i> | Fw  | GGGTTAGTTTGGAGTTTGTGTAGAG                   | 56                         | 115                |
|                      | Rv  | <b>BIOT</b> -CCCAACTACAACAAATAATCTCCAC      |                            |                    |
|                      | Seq | TTGTTTAGGTAGGATTGT                          |                            |                    |
| <i><b>HADHA</b></i>  | Fw  | GTAAGGTAGTTTGTGTTTTGGAGTTTAG                | 56                         | 224                |
|                      | Rv  | <b>BIOT</b> -AAATTTATATTAACATAATCCAACCTCTCT |                            |                    |
|                      | Seq | AAAATTTTATAAGATTATAGTTAG                    |                            |                    |

Primers were designed by the PyroMark Assay Design 2.0 software
