# Supplementary material for: DNA Methylation Signatures in Paired Placenta and Umbilical Cord Samples: Relationship with Maternal Pregestational Body Mass Index and Offspring Metabolic Outcomes
Source: MDPI journal article supplement (doi:10.3390/biomedicines12020301), 2024-01-27
Supplement: s1 [file s1]

**Suppl Table S3:** Levels of *HADHA* and *SLC2A8* methylation (by pyrosequencing) and expression (by RT-PCR) in placenta and umbilical cord

| PLACENTA       | Methylation (%) | Expression (2 <sup>-ΔCT</sup> ) |
|----------------|-----------------|---------------------------------|
| HADHA          | 5.70 ± 0.53     | 2.94 ± 0.12                     |
| SLC2A8         | 98.76 ± 0.23    | 0.76 ± 0.03                     |
| UMBILICAL CORD | Methylation (%) | Expression (2 <sup>-ΔCT</sup> ) |
| HADHA          | 14.8 6 ± 1.32   | 0.12 ± 0.01                     |
| SLC2A8         | 98.46 ± 0.32    | 0.01 ± 0.01                     |
