# Supplementary material for: DNA Methylation Signatures in Paired Placenta and Umbilical Cord Samples: Relationship with Maternal Pregestational Body Mass Index and Offspring Metabolic Outcomes
Source: Biomedicines. 2024 Jan 27;12(2):301. doi: 10.3390/biomedicines12020301 (PMC10886657; doi:10.3390/biomedicines12020301)
Supplement: Supplementary file 1 [file biomedicines-12-00301-s001.zip]

Archive with 4 entries (4 files):
- Suppl Table 1_primers_210721.pdf
- Suppl Table 3_pyroseq and RTpcr.pdf
- Suppl Table S2_all CpG_240111.xlsx
- Supplementary Figure s1_Flow chart.tiff
