# Supplementary material for: DNA Methylation Signatures in Paired Placenta and Umbilical Cord Samples: Relationship with Maternal Pregestational Body Mass Index and Offspring Metabolic Outcomes
Source: Biomedicines. 2024 Jan 27;12(2):301. doi: 10.3390/biomedicines12020301 (PMC10886657; doi:10.3390/biomedicines12020301)
Supplement: Supplementary file 1 [file biomedicines-12-00301-s001.zip › Suppl Table S2_all CpG_240111.xlsx]

## Sheet: Placenta
IlmnID	Estimate	OR	Chromosome	Position	Gene	Relation to Gene	Relation to CpG Island	Adjusted p-value
cg00005461	-0.0174692	0.982682	3	46131480	NA	NA	NA	4.90704e-05
cg00016156	0.0159735	1.0161	5	170815183	NPM1;NPM1;NPM1	Body;Body;Body	Island	3.9532e-05
cg00016226	0.0402564	1.04108	11	120008939	TRIM29	TSS200	S_Shore	2.86488e-06
cg00018783	-0.0208235	0.979392	1	54868743	SSBP3;SSBP3;SSBP3	Body;Body;Body	N_Shelf	2.93861e-05
cg00019301	0.0290293	1.02945	4	123843794	NUDT6;NUDT6;SPATA5	5'UTR;TSS200;TSS1500	Island	1.41357e-06
cg00026222	0.0462824	1.04737	1	2144244	NA	NA	Island	4.1411e-06
cg00046336	-0.0550341	0.946453	2	118617230	NA	NA	Island	3.99778e-05
cg00071442	0.036943	1.03763	14	64805784	ESR2	TSS1500	Island	2.33464e-05
cg00143362	-0.0323558	0.968162	10	15000025	MEIG1	TSS1500	N_Shore	3.56958e-05
cg00155504	0.0499223	1.05119	1	11160113	EXOSC10;EXOSC10	TSS200;TSS200	Island	5.76857e-05
cg00173785	0.0303988	1.03087	15	64126425	HERC1	TSS1500	Island	2.76091e-05
cg00208868	-0.0297299	0.970708	10	120706746	NA	NA	NA	4.66233e-05
cg00265512	0.0393822	1.04017	15	89147917	LINC01586;LINC01586	TSS200;Body	Island	1.24563e-05
cg00363045	0.0670007	1.0693	13	28611746	FLT3;FLT3	Body;Body	NA	1.50203e-08
cg00392505	-0.0521311	0.949204	10	134835146	NA	NA	Island	4.21907e-05
cg00396865	-0.0310562	0.969421	9	139620597	SNHG7;SNORA43;SNHG7;SNHG7	Body;Body;Body;Body	N_Shore	2.27721e-05
cg00400102	-0.0336746	0.966886	12	30907366	CAPRIN2;CAPRIN2;CAPRIN2;CAPRIN2;CAPRIN2;CAPRIN2	5'UTR;1stExon;1stExon;5'UTR;1stExon;5'UTR	Island	3.53662e-05
cg00504500	-0.0260567	0.97428	8	131017506	FAM49B;FAM49B	Body;Body	NA	7.05792e-06
cg00553833	-0.0262658	0.974076	1	29447700	TMEM200B	Body	Island	1.15394e-06
cg00562604	-0.0528404	0.948531	7	25590775	NA	NA	NA	3.74948e-05
cg00597555	-0.0851779	0.918349	15	90177036	KIF7	Body	NA	3.5807e-05
cg00628299	-0.0114373	0.988628	16	78094249	NA	NA	NA	1.07789e-05
cg00629612	-0.0624129	0.939495	11	32063009	LOC100506675;LOC100506675	TSS200;TSS200	NA	6.71589e-08
cg00632364	-0.044162	0.956799	6	170401305	NA	NA	N_Shore	8.09661e-06
cg00655923	-0.0322789	0.968236	7	64895418	NA	NA	NA	2.47084e-05
cg00699993	0.0161838	1.01632	4	158141570	GRIA2;GRIA2;GRIA2	TSS200;TSS1500;TSS200	Island	1.39889e-05
cg00702815	-0.0309517	0.969522	17	42845961	ADAM11	Body	NA	5.9722e-05
cg00712593	-0.0727495	0.929834	7	81809719	CACNA2D1	Body	NA	3.42696e-05
cg00766002	-0.0174561	0.982695	19	33651237	WDR88	Body	NA	5.79018e-05
cg00776112	-0.0452141	0.955793	10	6250645	PFKFB3;PFKFB3;PFKFB3	Body;Body;Body	NA	3.68648e-05
cg00831466	-0.0228344	0.977424	22	20795872	KLHL22	3'UTR	S_Shelf	6.4423e-07
cg00929392	-0.0254802	0.974842	1	19283191	IFFO2	TSS1500	Island	1.93708e-05
cg00931418	-0.0502982	0.950946	14	24539821	CPNE6;CPNE6	TSS1500;TSS1500	NA	1.30248e-06
cg00968739	-0.0241102	0.976178	20	34102625	NA	NA	NA	3.17065e-05
cg00985729	0.0334797	1.03405	6	30712559	IER3	TSS1500	S_Shore	2.77601e-05
cg01046945	-0.031221	0.969261	22	38034539	SH3BP1	TSS1500	N_Shore	3.25056e-06
cg01077185	-0.0272784	0.97309	7	149562623	ZNF862	3'UTR	S_Shelf	1.7102e-06
cg01129566	0.0403262	1.04115	6	114292449	HDAC2	TSS200	Island	2.12443e-06
cg01135754	-0.0316396	0.968856	16	54318044	IRX3	Body	Island	1.22654e-05
cg01138087	-0.016934	0.983209	3	141097568	ZBTB38	5'UTR	NA	1.18548e-06
cg01188578	0.102906	1.10839	2	26464058	HADHA	Body	N_Shelf	2.48057e-05
cg01195281	0.021764	1.022	20	5100780	PCNA;PCNA	TSS200;5'UTR	Island	2.45293e-05
cg01230243	0.0260213	1.02636	6	138482608	KIAA1244	TSS1500	Island	4.05064e-05
cg01232495	0.0370186	1.03771	21	37433125	SETD4;SETD4;SETD4;SETD4;SETD4	TSS1500;TSS1500;TSS200;TSS200;TSS200	Island	6.16695e-06
cg01258786	-0.0212397	0.978984	11	6432602	APBB1;APBB1;APBB1;APBB1;APBB1;APBB1	ExonBnd;ExonBnd;ExonBnd;5'UTR;5'UTR;Body	NA	2.38443e-05
cg01269344	0.0408033	1.04165	21	33246216	HUNK	1stExon	Island	1.0538e-06
cg01313234	-0.0193019	0.980883	8	82595877	IMPA1;IMPA1;IMPA1	5'UTR;5'UTR;Body	N_Shelf	8.71271e-06
cg01353569	0.0401349	1.04095	7	106810328	HBP1	5'UTR	Island	3.65383e-06
cg01433202	-0.0484674	0.952688	2	83283303	NA	NA	NA	2.84302e-05
cg01436700	0.0274094	1.02779	2	105953902	C2orf49	TSS200	Island	3.10912e-05
cg01447429	-0.0670195	0.935177	16	29222265	NA	NA	NA	2.5854e-05
cg01484897	-0.0393143	0.961448	16	68586498	ZFP90;ZFP90;ZFP90;ZFP90;ZFP90;ZFP90;ZFP90;ZFP90;ZFP90	Body;Body;Body;Body;Body;Body;Body;Body;Body	NA	2.61453e-05
cg01514742	0.030194	1.03065	9	139844462	NA	NA	Island	8.25626e-06
cg01562658	-0.0318216	0.968679	2	216897171	NA	NA	NA	5.61305e-05
cg01579370	-0.0169629	0.98318	8	102381161	NACAP1	Body	NA	5.94988e-05
cg01614716	0.0378071	1.03853	1	43834120	ELOVL1	TSS1500	Island	1.02886e-06
cg01620309	0.021106	1.02133	17	42856469	ADAM11	Body	N_Shore	1.3882e-05
cg01621168	-0.0264067	0.973939	19	58875652	ZNF497;ZNF497	TSS1500;TSS1500	S_Shore	1.23687e-05
cg01661567	-0.0353773	0.965241	4	1843351	LETM1	Body	Island	4.22465e-06
cg01672380	0.0132939	1.01338	4	6717825	CNO	TSS200	N_Shore	2.86046e-05
cg01685319	0.0414003	1.04227	19	45458225	CLPTM1;CLPTM1;CLPTM1	TSS1500;TSS200;5'UTR	Island	1.09551e-05
cg01691411	-0.0374056	0.963285	9	98079551	FANCC;FANCC;FANCC	TSS200;5'UTR;5'UTR	Island	1.38913e-05
cg01693108	0.0330779	1.03363	6	35888298	SRPK1	Body	N_Shore	8.91892e-08
cg01701314	-0.0223934	0.977855	20	36124339	NA	NA	NA	1.42882e-05
cg01704847	-0.0317297	0.968768	4	2302858	ZFYVE28;ZFYVE28;ZFYVE28	Body;Body;Body	N_Shelf	5.70826e-05
cg01738524	-0.0324079	0.968112	16	68702627	CDH3	Body	NA	4.23761e-05
cg01759469	-0.0197517	0.980442	1	16976121	MST1P2	Body	S_Shore	7.92392e-06
cg01769232	0.0603463	1.0622	6	110300218	GPR6	TSS200	Island	2.61322e-05
cg01777586	-0.0295815	0.970852	17	80163174	CCDC57	5'UTR	NA	5.18999e-06
cg01800262	-0.0205222	0.979687	1	54360170	DIO1;DIO1;DIO1;DIO1	1stExon;1stExon;Body;1stExon	NA	2.38335e-05
cg01803294	-0.0649057	0.937156	5	54239929	NA	NA	NA	2.00846e-05
cg01804036	0.0321524	1.03267	12	117483310	TESC;TESC;TESC	Body;Body;Body	N_Shore	1.94463e-05
cg01810684	-0.0226277	0.977626	16	87943801	CA5A	Body	NA	4.90587e-07
cg01829889	-0.0737927	0.928864	14	79032495	NRXN3	5'UTR	NA	7.68159e-07
cg01838863	-0.0353059	0.96531	16	87736832	LOC100129637	Body	Island	8.00337e-06
cg01914314	-0.0340982	0.966477	5	157117640	NA	NA	Island	3.71753e-05
cg01958356	-0.0463158	0.95474	18	11751317	GNAL;GNAL;GNAL	TSS200;TSS200;Body	Island	4.33868e-06
cg01969916	0.0408214	1.04167	10	43048609	ZNF37B	TSS1500	S_Shore	2.41658e-07
cg02043408	-0.0911561	0.912875	1	184970623	NA	NA	NA	2.84217e-06
cg02047547	0.0475679	1.04872	16	19126242	ITPRIPL2;ITPRIPL2	1stExon;Body	Island	4.48981e-05
cg02076939	0.0270763	1.02745	11	118042561	SCN2B	Body	NA	5.64993e-05
cg02079122	0.0591877	1.06097	1	240262933	FMN2	Body	NA	4.53451e-05
cg02094460	-0.0438425	0.957105	2	11977415	MIR4262	TSS1500	NA	3.46092e-06
cg02119598	-0.0254296	0.974891	16	75096992	ZNRF1	Body	NA	1.36683e-05
cg02140963	-0.0172679	0.98288	5	140746162	PCDHGA4;PCDHGA2;PCDHGA5;PCDHGB2;PCDHGA1;PCDHGB1;PCDHGA3;PCDHGA5	Body;Body;1stExon;Body;Body;Body;Body;1stExon	S_Shore	5.37518e-05
cg02153172	-0.0245671	0.975732	13	50114789	RCBTB1	Body	NA	2.95863e-05
cg02158499	0.0264383	1.02679	19	54960210	LENG8-AS1;LENG8	Body;TSS200	Island	3.86295e-05
cg02159610	0.0340723	1.03466	16	29822716	PRRT2	TSS1500	N_Shore	5.31607e-05
cg02194974	-0.033949	0.966621	1	3154447	PRDM16;PRDM16	Body;Body	N_Shore	3.19718e-05
cg02197919	0.0323812	1.03291	20	31989448	CDK5RAP1;CDK5RAP1	TSS200;TSS200	S_Shore	3.09825e-05
cg02208506	0.027905	1.0283	17	4634804	MED11	1stExon	Island	2.79156e-05
cg02272150	0.0225995	1.02286	14	90864424	CALM1;CALM1	TSS200;Body	Island	6.21201e-08
cg02403929	-0.022498	0.977753	17	78930306	RPTOR;RPTOR	Body;Body	NA	3.34967e-06
cg02455792	-0.0281094	0.972282	1	16524978	ARHGEF19	3'UTR	NA	1.87016e-05
cg02483271	0.0213991	1.02163	7	42277950	GLI3	TSS1500	S_Shore	3.32985e-05
cg02497428	-0.0303049	0.97015	16	21665138	METTL9;IGSF6;METTL9	Body;TSS1500;Body	NA	1.65818e-05
cg02550120	0.0276702	1.02806	2	74684880	INO80B-WBP1;INO80B;WBP1	Body;Body;TSS1500	Island	1.9794e-05
cg02588277	-0.0362404	0.964408	2	65116564	NA	NA	NA	4.95797e-05
cg02597504	-0.04857	0.952591	2	26364164	NA	NA	NA	7.83053e-06
cg02609781	0.0581257	1.05985	13	50656090	DLEU1;DLEU2	TSS1500;Body	Island	1.18115e-05
cg02615376	-0.0298763	0.970566	5	141755319	NA	NA	NA	5.39715e-09
cg02627966	-0.0259899	0.974345	7	54899537	NA	NA	N_Shore	4.89054e-05
cg02651894	0.0337841	1.03436	3	52738950	GLT8D1;SPCS1;GLT8D1;GLT8D1;GLT8D1;GLT8D1;GLT8D1;GLT8D1;GLT8D1	TSS1500;TSS1500;ExonBnd;ExonBnd;ExonBnd;5'UTR;5'UTR;5'UTR;5'UTR	N_Shore	5.57523e-05
cg02673986	-0.0288488	0.971563	1	27683912	MAP3K6	Body	S_Shore	1.01932e-05
cg02694800	-0.0229809	0.977281	6	42237575	TRERF1;TRERF1;TRERF1;TRERF1	ExonBnd;ExonBnd;5'UTR;5'UTR	NA	4.73844e-05
cg02703606	-0.0249321	0.975376	3	38150443	DLEC1;DLEC1	Body;Body	NA	2.79836e-07
cg02716646	-0.0561642	0.945384	2	25384293	POMC;POMC	Body;Body	Island	1.97796e-05
cg02731828	-0.0596164	0.942126	22	49338940	NA	NA	NA	5.11606e-06
cg02767668	-0.0219012	0.978337	19	12755386	NA	NA	S_Shore	6.70501e-06
cg02767759	0.0349577	1.03558	16	30366751	CD2BP2;CD2BP2	TSS1500;TSS200	Island	2.75151e-05
cg02791145	-0.0662628	0.935885	11	50220426	NA	NA	NA	1.40699e-05
cg02804895	-0.0335826	0.966975	4	47983663	CNGA1;LOC101927157;CNGA1	TSS200;Body;5'UTR	NA	2.33951e-05
cg02807296	-0.024396	0.975899	9	137006662	WDR5;WDR5	Body;Body	NA	2.14482e-05
cg02920634	-0.0368512	0.96382	13	73464851	PIBF1	Body	NA	2.14434e-05
cg02973680	-0.0735301	0.929108	8	2669421	NA	NA	NA	2.03535e-05
cg02993069	-0.037178	0.963505	1	36786777	C1orf113;C1orf113	3'UTR;3'UTR	Island	9.0721e-06
cg02996869	0.0484238	1.04962	1	82267171	LPHN2	5'UTR	Island	1.9874e-05
cg03022699	0.0246821	1.02499	6	33168784	SLC39A7;SLC39A7;SLC39A7;SLC39A7;RXRB;RXRB;RXRB	5'UTR;5'UTR;5'UTR;1stExon;TSS200;TSS1500;TSS1500	S_Shore	5.98906e-05
cg03024503	0.0343909	1.03499	3	182400369	NA	NA	Island	2.21872e-05
cg03046817	-0.0195698	0.98062	17	55456412	MSI2;MSI2	Body;Body	NA	2.54296e-05
cg03063347	-0.0158699	0.984255	6	36515153	STK38;STK38	1stExon;5'UTR	Island	1.50018e-05
cg03099535	-0.0458498	0.955185	3	197330576	NA	NA	NA	1.95897e-05
cg03123666	-0.0244397	0.975857	19	1784177	ATP8B3;ATP8B3;ATP8B3	Body;Body;Body	NA	1.74745e-05
cg03131366	-0.0470359	0.954053	12	2041707	NA	NA	NA	1.08695e-05
cg03200341	0.035773	1.03642	6	90348309	LYRM2;LYRM2;LYRM2;LYRM2	TSS200;Body;TSS200;TSS200	Island	6.0442e-07
cg03214236	-0.0261979	0.974142	1	182771197	NPL;NPL;NPL;NPL;NPL	5'UTR;Body;Body;Body;Body	NA	3.52351e-07
cg03286833	-0.0362019	0.964446	9	116343114	RGS3;RGS3;RGS3;RGS3;RGS3;RGS3;RGS3	TSS200;Body;Body;5'UTR;5'UTR;Body;Body	N_Shelf	2.46869e-05
cg03323088	-0.0190872	0.981094	17	48750689	ABCC3	Body	NA	4.58123e-05
cg03323793	-0.0325494	0.967975	7	151548111	PRKAG2	Body	NA	1.57864e-08
cg03357803	-0.106251	0.899199	15	28272345	OCA2	Body	NA	3.75815e-05
cg03367622	-0.067162	0.935044	7	144967385	NA	NA	NA	4.27904e-05
cg03430065	-0.0221991	0.978045	12	130623373	NA	NA	Island	6.04939e-05
cg03443922	0.0280477	1.02844	7	107384711	CBLL1;CBLL1	Body;Body	Island	2.59038e-05
cg03492894	-0.0227897	0.977468	11	46391995	DGKZ;DGKZ;DGKZ;DGKZ;DGKZ;DGKZ;DGKZ	Body;Body;Body;Body;Body;Body;Body	S_Shelf	2.00654e-05
cg03530172	-0.0942751	0.910032	14	21944716	RAB2B;TOX4;TOX4;RAB2B;RAB2B;RAB2B	5'UTR;TSS1500;TSS1500;1stExon;Body;Body	N_Shore	3.84382e-05
cg03537163	-0.0248786	0.975428	19	814520	LPPR3	Body	Island	4.11493e-06
cg03543453	0.0434141	1.04437	10	978919	LARP4B;LOC101927762	TSS1500;TSS200	S_Shore	1.41679e-05
cg03583111	-0.0483206	0.952828	2	220283442	DES	1stExon	Island	2.27009e-05
cg03585667	-0.0282144	0.97218	2	99528589	KIAA1211L	5'UTR	NA	3.38864e-06
cg03606328	-0.0208548	0.979361	1	62902271	USP1;USP1;USP1	5'UTR;TSS200;5'UTR	Island	1.62007e-05
cg03621010	-0.0231629	0.977103	1	31186460	MATN1	Body	NA	1.62803e-06
cg03635300	0.0492113	1.05044	19	5802444	NA	NA	Island	5.02468e-05
cg03641729	-0.0210063	0.979213	19	46636173	NA	NA	NA	4.52527e-05
cg03688640	0.0260223	1.02636	17	40074656	ACLY;ACLY	5'UTR;5'UTR	Island	2.7513e-05
cg03722908	-0.0493265	0.95187	6	164758166	NA	NA	Island	5.9531e-06
cg03741350	-0.0224767	0.977774	17	29296455	RNF135;RNF135;RNF135	TSS1500;TSS1500;TSS1500	N_Shore	1.1398e-05
cg03754582	-0.04507	0.955931	1	35442255	NA	NA	Island	3.02576e-05
cg03768106	0.0412964	1.04216	11	111957237	TIMM8B;SDHD;TIMM8B	Body;TSS1500;Body	N_Shore	2.69239e-05
cg03784625	-0.0223303	0.977917	3	53214866	PRKCD;PRKCD	Body;Body	NA	6.33294e-06
cg03798014	0.0148879	1.015	17	42581289	GPATCH8;GPATCH8;GPATCH8;GPATCH8;GPATCH8	TSS1500;TSS1500;TSS1500;TSS1500;TSS1500	S_Shore	7.79106e-06
cg03815962	-0.0182309	0.981934	8	61496575	RAB2A;RAB2A	Body;Body	NA	4.18934e-05
cg03839625	0.0282983	1.0287	20	43538443	PABPC1L	TSS1500	N_Shore	2.0553e-05
cg03862540	0.0319061	1.03242	18	9614206	PPP4R1;PPP4R1	Body;Body	NA	2.62077e-05
cg03923353	-0.0613937	0.940453	1	4042491	NA	NA	NA	2.59197e-05
cg03932201	-0.0299501	0.970494	10	129222937	DOCK1	Body	NA	3.8047e-05
cg03970032	-0.025413	0.974907	1	16062915	SLC25A34;SLC25A34	5'UTR;1stExon	NA	3.02008e-05
cg03992443	-0.0388932	0.961853	11	70634959	SHANK2	Body	NA	6.47548e-06
cg04069074	-0.0553642	0.946141	13	112051117	NA	NA	N_Shelf	1.41933e-05
cg04091461	-0.0288396	0.971572	2	129045562	HS6ST1	Body	NA	1.35544e-05
cg04099264	0.0359766	1.03663	1	44435507	DPH2;DPH2	TSS200;TSS200	Island	2.09499e-05
cg04127242	-0.0180626	0.9821	9	139990710	MAN1B1;MAN1B1;MAN1B1	Body;Body;Body	NA	2.65782e-05
cg04142692	-0.0233962	0.976875	11	67379534	NDUFV1;NDUFV1	Body;Body	NA	5.34209e-06
cg04174014	0.0370049	1.0377	7	79763794	GNAI1;GNAI1	TSS1500;TSS1500	Island	5.72877e-06
cg04178207	-0.0255652	0.974759	6	30878437	GTF2H4	Body	N_Shelf	1.71595e-06
cg04189201	0.0369554	1.03765	9	137028998	NA	NA	Island	4.77418e-05
cg04202539	0.0377588	1.03848	6	7976951	BLOC1S5-TXNDC5	Body	NA	2.58774e-05
cg04212021	-0.0323922	0.968127	5	180231084	MGAT1;MGAT1;MGAT1;MGAT1;MGAT1	5'UTR;TSS200;TSS1500;5'UTR;TSS200	S_Shore	1.53056e-05
cg04226364	0.0691587	1.07161	17	47865990	MYST2	TSS200	Island	7.38684e-08
cg04255037	-0.062587	0.939331	12	95034515	TMCC3	Body	NA	2.73752e-05
cg04258380	0.0415728	1.04245	1	26249582	NA	NA	Island	4.81883e-06
cg04265670	0.0347731	1.03538	5	172572253	BNIP1;BNIP1;BNIP1;BNIP1	Body;Body;Body;Body	NA	1.50852e-05
cg04285710	0.0336007	1.03417	1	74891564	TNNI3K;TNNI3K	Body;Body	NA	5.74808e-05
cg04304659	-0.0419419	0.958926	18	71983375	NA	NA	Island	1.83106e-05
cg04311362	-0.028824	0.971587	12	8519228	LINC00937	Body	NA	2.91151e-07
cg04353171	-0.0213921	0.978835	6	30698729	FLOT1	Body	NA	7.13299e-07
cg04382416	-0.0236395	0.976638	4	8440238	ACOX3;ACOX3	5'UTR;5'UTR	N_Shelf	4.27718e-06
cg04406981	-0.0274675	0.972906	19	48453315	SNAR-C3	TSS1500	NA	6.10007e-06
cg04440811	-0.0308301	0.96964	11	129817712	PRDM10;PRDM10;PRDM10;PRDM10	TSS200;TSS200;Body;Body	NA	5.04776e-06
cg04453594	-0.0420689	0.958804	5	140772859	PCDHGA4;PCDHGA6;PCDHGA1;PCDHGA5;PCDHGB1;PCDHGB4;PCDHGA3;PCDHGA2;PCDHGA8;PCDHGA7;PCDHGB2;PCDHGA8;PCDHGB3	Body;Body;Body;Body;Body;Body;Body;Body;1stExon;Body;Body;1stExon;Body	N_Shore	2.40683e-05
cg04481053	-0.0275677	0.972809	11	73008839	P2RY6;P2RY6;P2RY6;P2RY6	3'UTR;3'UTR;3'UTR;3'UTR	NA	6.03352e-06
cg04489069	0.0422866	1.04319	6	149069824	UST	Body	S_Shore	4.52631e-05
cg04508286	0.0525355	1.05394	7	35840410	SEPT7;SEPT7	TSS1500;TSS1500	Island	4.49397e-08
cg04533640	-0.0311247	0.969355	17	47950952	NA	NA	NA	1.4304e-05
cg04535364	-0.0349513	0.965652	12	52226316	FIGNL2	TSS1500	NA	3.08387e-06
cg04554987	-0.0299143	0.970529	12	49110849	CCNT1	TSS200	Island	8.00221e-06
cg04578738	0.0289803	1.0294	17	34136331	TAF15;TAF15	TSS200;TSS200	Island	4.0144e-05
cg04589904	0.0287143	1.02913	10	115802840	ADRB1	TSS1500	N_Shore	1.39354e-06
cg04614053	0.0752448	1.07815	19	12250778	ZNF20	Body	Island	8.35385e-07
cg04629033	0.0362659	1.03693	2	240490543	NA	NA	NA	2.40842e-05
cg04727924	-0.0218366	0.9784	7	799746	HEATR2	Body	S_Shelf	6.00407e-05
cg04730372	-0.0411284	0.959706	6	168132811	NA	NA	N_Shelf	4.10394e-07
cg04749453	-0.0414486	0.959399	16	29153300	NA	NA	Island	4.97062e-06
cg04755363	-0.0218748	0.978363	19	10894947	DNM2;DNM2;DNM2;DNM2;DNM2	Body;Body;Body;Body;Body	NA	1.88156e-05
cg04770218	-0.0184734	0.981696	6	32136890	AGPAT1;AGPAT1	3'UTR;3'UTR	S_Shore	9.59291e-06
cg04775941	0.0286344	1.02905	8	141474793	NA	NA	Island	5.36482e-05
cg04803402	-0.0476308	0.953486	11	133767993	MIR4697HG	Body	NA	3.58326e-05
cg04829416	-0.0281283	0.972264	6	18368387	NA	NA	NA	4.1307e-05
cg04854107	0.0375951	1.03831	15	38544003	SPRED1	TSS1500	Island	3.47849e-06
cg04899492	0.0963196	1.10111	6	24126312	NRSN1	TSS200	Island	5.82372e-05
cg04909508	0.0446767	1.04569	2	27592653	EIF2B4;EIF2B4;SNX17;EIF2B4	Body;Body;TSS1500;Body	N_Shore	1.62884e-05
cg04918002	0.0208025	1.02102	16	87423124	FBXO31	Body	N_Shelf	4.00637e-05
cg04934530	-0.0255446	0.974779	22	47080171	NA	NA	N_Shore	5.22961e-05
cg04940901	-0.0238765	0.976406	3	52418250	DNAH1	Body	NA	1.04007e-06
cg04962506	-0.0235907	0.976685	17	55712628	MSI2	Body	NA	2.88427e-05
cg04963560	-0.0296193	0.970815	17	16593063	CCDC144A	TSS1500	Island	6.78806e-06
cg04975811	-0.0274229	0.97295	10	73491805	C10orf105;CDH23;CDH23	5'UTR;Body;Body	NA	1.5574e-09
cg05091796	0.0343016	1.0349	16	4465799	CORO7	Body	N_Shore	2.88465e-05
cg05132705	-0.03891	0.961837	1	31956275	NA	NA	NA	2.42733e-05
cg05170230	-0.0409974	0.959832	5	2512200	NA	NA	NA	2.5938e-05
cg05174290	-0.0277019	0.972678	2	24114887	ATAD2B;ATAD2B;ATAD2B	Body;Body;Body	NA	4.62652e-05
cg05208381	0.0459735	1.04705	2	45870771	NA	NA	Island	3.80676e-06
cg05219726	-0.0729095	0.929685	13	114302504	NA	NA	Island	2.38337e-05
cg05230009	-0.0450364	0.955963	4	190229571	NA	NA	Island	1.27197e-05
cg05234517	-0.0155883	0.984533	5	74677477	COL4A3BP;COL4A3BP;COL4A3BP	Body;Body;Body	NA	1.27018e-05
cg05236313	-0.0610964	0.940733	4	7282422	SORCS2	Body	NA	5.72739e-05
cg05267740	-0.0124414	0.987636	6	9126522	NA	NA	NA	2.16997e-05
cg05289000	-0.00668287	0.993339	7	136866658	NA	NA	NA	2.61542e-05
cg05305986	-0.0148991	0.985211	17	37185064	NA	NA	NA	8.96008e-06
cg05315590	0.0435762	1.04454	1	207641582	CR2;CR2	Body;Body	NA	1.79969e-05
cg05317455	-0.0265229	0.973826	11	69811162	NA	NA	N_Shelf	9.12925e-06
cg05342138	-0.0328765	0.967658	11	7526738	OLFML1	Body	NA	3.95946e-05
cg05361229	-0.0246919	0.97561	10	105349996	NEURL1	Body	NA	1.65768e-08
cg05370569	0.0426238	1.04355	16	23464705	COG7	TSS1500	S_Shore	4.03771e-06
cg05371909	0.0311575	1.03165	1	156426550	NA	NA	Island	1.07686e-06
cg05378190	-0.0789481	0.924088	14	107283432	NA	NA	NA	1.09458e-07
cg05379329	-0.0400225	0.960768	1	233016920	NA	NA	NA	1.33293e-06
cg05481257	-0.0372412	0.963444	2	20870211	GDF7	Body	Island	1.79729e-05
cg05493528	-0.0233467	0.976924	1	65631531	AK4;AK4;AK4	Body;Body;Body	NA	2.52234e-05
cg05513509	0.0509923	1.05231	18	20513742	RBBP8;RBBP8;RBBP8	TSS200;TSS200;5'UTR	Island	5.46932e-05
cg05525106	0.0344541	1.03505	6	74162089	C6orf150	TSS200	Island	6.3092e-07
cg05533539	-0.0214481	0.97878	17	44104521	MAPT;MAPT;MAPT;MAPT;MAPT;MAPT	3'UTR;3'UTR;3'UTR;3'UTR;3'UTR;3'UTR	NA	1.01205e-05
cg05647660	0.0275655	1.02795	4	76439704	RCHY1;THAP6;THAP6;RCHY1;RCHY1	TSS200;1stExon;5'UTR;TSS200;TSS200	Island	1.44779e-05
cg05676117	-0.0322738	0.968241	1	200721079	CAMSAP2;CAMSAP2;CAMSAP2	Body;Body;Body	NA	3.08914e-06
cg05692725	-0.0205395	0.97967	12	95115217	NA	NA	NA	4.55989e-05
cg05699039	0.0248529	1.02516	11	64174334	NA	NA	NA	1.48837e-05
cg05706471	-0.0104062	0.989648	17	62832514	PLEKHM1P	Body	N_Shore	4.40216e-05
cg05745317	0.031599	1.0321	6	27441043	ZNF184	TSS200	Island	3.51953e-05
cg05786053	0.0362393	1.0369	1	118473064	GDAP2;GDAP2;WDR3	TSS1500;TSS1500;5'UTR	S_Shore	4.83305e-05
cg05850206	0.0284288	1.02884	12	64238366	SRGAP1	TSS200	Island	1.56972e-05
cg05863144	0.0348026	1.03542	14	96830329	ATG2B	TSS1500	Island	4.86206e-05
cg05866778	-0.0240986	0.976189	7	44098334	DBNL;DBNL;DBNL;DBNL;DBNL	Body;Body;Body;Body;Body	NA	1.72937e-05
cg05879496	-0.0492554	0.951938	16	46660595	NA	NA	NA	7.56058e-08
cg05888872	0.0981057	1.10308	10	14050479	FRMD4A	Body	NA	1.23009e-07
cg05904916	-0.0304034	0.970054	4	8151037	ABLIM2;ABLIM2;ABLIM2;ABLIM2;ABLIM2;ABLIM2;ABLIM2	Body;Body;Body;Body;Body;Body;Body	N_Shelf	1.12313e-05
cg05911841	-0.027353	0.973018	18	29257815	B4GALT6	Body	NA	8.85109e-06
cg05935904	-0.0355896	0.965036	6	170405014	NA	NA	S_Shelf	5.58332e-05
cg05958872	-0.0237933	0.976488	12	6980222	SPSB2;SPSB2	3'UTR;3'UTR	N_Shelf	9.82111e-06
cg06018203	0.0349474	1.03557	3	179040370	ZNF639	TSS1500	N_Shore	2.70233e-07
cg06030166	0.0277968	1.02819	22	44419905	PARVB;PARVB	Body;TSS1500	Island	4.1531e-05
cg06031904	-0.0554897	0.946022	12	40735972	LRRK2	Body	NA	2.05985e-05
cg06039074	-0.0213322	0.978894	16	89502388	ANKRD11	5'UTR	S_Shelf	4.10531e-07
cg06044703	0.0165203	1.01666	9	123691111	TRAF1	5'UTR	Island	4.48506e-05
cg06069030	-0.024744	0.97556	16	89920590	SPIRE2	Body	Island	8.84274e-06
cg06094523	-0.0203195	0.979886	1	43398103	SLC2A1	Body	NA	1.66362e-05
cg06108849	0.0349684	1.03559	11	130397805	NA	NA	NA	1.07943e-06
cg06116095	0.0211423	1.02137	11	93861851	PANX1	TSS1500	Island	3.55351e-05
cg06176532	-0.020625	0.979586	6	110544390	CDC40	Body	NA	5.63401e-06
cg06211172	-0.0226296	0.977625	16	27730610	KIAA0556	Body	NA	4.33366e-05
cg06219577	0.0292201	1.02965	22	41682540	RANGAP1	TSS1500	Island	3.62661e-08
cg06234511	-0.0840641	0.919372	12	83953441	NA	NA	NA	4.73922e-05
cg06249215	0.0188352	1.01901	5	95297787	ELL2;LOC101929710	TSS200;Body	S_Shore	5.70893e-06
cg06290693	0.0247529	1.02506	12	56522776	ESYT1;ESYT1	Body;Body	S_Shore	2.34035e-06
cg06379599	-0.0198519	0.980344	9	99688071	NA	NA	S_Shore	2.91147e-05
cg06414605	0.0248412	1.02515	3	193853892	HES1	TSS200	N_Shore	3.5309e-05
cg06455125	-0.0132598	0.986828	2	117913944	NA	NA	NA	1.76981e-06
cg06471816	-0.0265777	0.973772	10	54710134	NA	NA	NA	9.9674e-06
cg06488988	0.0505782	1.05188	11	96123559	JRKL;JRKL;CCDC82	5'UTR;1stExon;TSS1500	Island	3.54308e-08
cg06509047	-0.0291176	0.971302	1	12064077	MFN2;MFN2	Body;Body	NA	6.72355e-08
cg06562245	-0.0278065	0.972577	9	101987517	SEC61B	Body	S_Shelf	3.7897e-07
cg06666157	0.0332316	1.03379	19	4791552	FEM1A	TSS200	Island	2.14233e-06
cg06677690	-0.0523629	0.948984	4	2302953	ZFYVE28	Body	N_Shelf	1.03623e-05
cg06754493	-0.0188784	0.981299	1	9615629	SLC25A33	Body	NA	2.2156e-05
cg06768079	-0.0877058	0.91603	8	23225606	LOXL2	Body	NA	2.47755e-06
cg06772267	-0.0467753	0.954302	2	240422779	NA	NA	NA	4.3498e-05
cg06786600	-0.0299008	0.970542	17	38666816	NA	NA	NA	3.19947e-06
cg06792358	0.063641	1.06571	6	24126324	NRSN1	TSS200	Island	6.9903e-06
cg06846259	-0.0607029	0.941103	2	25384654	POMC;POMC	Body;Body	Island	5.24738e-05
cg06860618	0.0188589	1.01904	4	39529410	UGDH	TSS200	Island	2.57641e-05
cg06884658	0.0670764	1.06938	12	59471672	NA	NA	NA	3.61108e-05
cg06895218	-0.0519129	0.949412	6	151558246	NA	NA	N_Shelf	6.92116e-06
cg06973320	0.0244676	1.02477	17	27038195	PROCA1;PROCA1;PROCA1;PROCA1;PROCA1;PROCA1	TSS200;TSS200;Body;Body;Body;5'UTR	Island	4.2633e-05
cg07056518	-0.0289346	0.97148	5	150975440	NA	NA	NA	1.07045e-05
cg07088913	-0.0170334	0.983111	4	37635937	RELL1;RELL1	Body;Body	NA	2.38355e-05
cg07098946	-0.0231532	0.977113	17	45366480	ITGB3	Body	NA	6.08872e-05
cg07117119	0.0253903	1.02572	16	68119705	NFATC3;NFATC3;NFATC3;NFATC3	Body;Body;Body;Body	Island	3.89773e-05
cg07118455	0.0435818	1.04455	19	37861692	ZNF527	TSS1500	Island	4.70053e-08
cg07124859	-0.0384608	0.962269	12	57588219	LRP1;MIR1228	Body;TSS200	NA	2.7424e-06
cg07125981	-0.0345718	0.966019	10	35330496	CUL2	Body	NA	1.44222e-05
cg07132710	-0.0175838	0.98257	3	128202797	GATA2;GATA2;GATA2	Body;Body;Body	N_Shelf	1.00774e-05
cg07139316	-0.0266324	0.973719	7	98965063	NA	NA	NA	3.60446e-06
cg07142555	0.0452503	1.04629	17	45056929	RPRML	TSS1500	S_Shore	1.92034e-05
cg07153826	-0.0120652	0.988007	20	60962721	RPS21	Body	Island	4.27992e-05
cg07179872	-0.0833141	0.920062	5	140802135	PCDHGA4;PCDHGA9;PCDHGA1;PCDHGB1;PCDHGB6;PCDHGB3;PCDHGA11;PCDHGB7;PCDHGA6;PCDHGA8;PCDHGA11;PCDHGA10;PCDHGA5;PCDHGB4;PCDHGA3;PCDHGA11;PCDHGA2;PCDHGB2;PCDHGA7;PCDHGB5	Body;Body;Body;Body;Body;Body;1stExon;Body;Body;Body;1stExon;Body;Body;Body;Body;1stExon;Body;Body;Body;Body	N_Shore	3.66567e-06
cg07194495	0.0344564	1.03506	7	148958859	ZNF783	TSS1500	Island	4.47072e-05
cg07199849	-0.0173171	0.982832	19	1142458	SBNO2	Body	S_Shore	6.18238e-06
cg07283630	-0.0626506	0.939272	15	48667436	NA	NA	NA	2.17296e-06
cg07303241	-0.02027	0.979934	9	129260174	MVB12B	Body	N_Shore	1.11337e-05
cg07322164	-0.0173725	0.982777	20	32246201	NECAB3;NECAB3	Body;Body	NA	2.06758e-05
cg07373872	-0.0288336	0.971578	17	48631634	SPATA20;SPATA20;SPATA20	Body;Body;Body	NA	2.46861e-05
cg07399532	-0.0683286	0.933954	8	10001612	MSRA;MSRA;MSRA	Body;Body;Body	NA	4.17168e-05
cg07456681	-0.0256471	0.974679	16	15146876	NTAN1	Body	N_Shelf	3.73672e-06
cg07478397	0.0248952	1.02521	4	57333700	SRP72	TSS200	Island	2.69209e-05
cg07478825	-0.0390778	0.961676	20	44810027	CDH22	Body	S_Shelf	3.03596e-05
cg07498879	-0.0257885	0.974541	22	30663041	OSM	TSS1500	NA	4.94751e-05
cg07533003	-0.027582	0.972795	19	19609379	GATAD2A;GATAD2A	Body;Body	N_Shelf	3.68053e-05
cg07636688	0.0578045	1.05951	22	45809402	SMC1B;RIBC2	1stExon;TSS200	Island	4.00836e-05
cg07703277	0.0302653	1.03073	20	2083193	STK35	Body	Island	1.99808e-05
cg07709181	0.0917146	1.09605	8	75545601	MIR2052HG	Body	NA	3.18809e-05
cg07711889	-0.0266344	0.973717	2	71292691	NA	NA	N_Shelf	1.38505e-05
cg07720974	-0.0250483	0.975263	14	31598365	HECTD1	Body	NA	8.6713e-07
cg07725970	0.0397317	1.04053	12	27091851	FGFR1OP2;C12orf11	5'UTR;TSS1500	Island	1.3167e-05
cg07734889	0.0445631	1.04557	8	75896383	CRISPLD1	TSS1500	N_Shore	3.19973e-07
cg07766946	-0.0336449	0.966915	6	131450974	NA	NA	NA	3.10544e-05
cg07856560	-0.0286712	0.971736	17	78945015	NA	NA	NA	2.15231e-05
cg07880943	-0.0221528	0.978091	13	46744500	LCP1	5'UTR	NA	1.29191e-05
cg07905034	-0.0272513	0.973117	9	92041302	SEMA4D;SEMA4D	5'UTR;5'UTR	NA	2.33179e-05
cg07918726	0.0562683	1.05788	8	145559963	SCRT1	TSS200	Island	1.55424e-07
cg07921501	-0.0278451	0.972539	9	101820391	COL15A1	Body	NA	2.45548e-05
cg07924874	0.035866	1.03652	19	58609793	ZSCAN18;ZSCAN18;ZSCAN18;ZSCAN18	Body;TSS200;TSS200;TSS200	Island	5.84109e-05
cg07952877	-0.0637996	0.938193	18	77171705	NFATC1;NFATC1;NFATC1;NFATC1;NFATC1	Body;5'UTR;Body;Body;Body	Island	2.2526e-06
cg08005007	-0.0111126	0.988949	3	116079127	LSAMP	Body	NA	1.90239e-06
cg08018563	-0.0465055	0.954559	8	144059113	NA	NA	NA	2.73766e-05
cg08060055	-0.0285837	0.971821	18	9792230	RAB31;RAB31	ExonBnd;Body	NA	5.63762e-06
cg08069043	0.0270229	1.02739	5	175816344	NOP16;HIGD2A	TSS1500;Body	Island	3.79298e-05
cg08077981	-0.0277293	0.972652	12	109026956	SELPLG;SELPLG	TSS1500;5'UTR	NA	5.94145e-05
cg08085199	-0.0262674	0.974075	16	69170548	CIRH1A	Body	S_Shelf	5.81952e-07
cg08103706	-0.0231699	0.977096	16	56713771	NA	NA	N_Shelf	2.42453e-05
cg08108911	0.0434567	1.04441	1	157015297	ARHGEF11;ARHGEF11	TSS200;TSS200	Island	2.46718e-06
cg08109030	-0.0298575	0.970584	17	1189376	TUSC5	Body	NA	5.66172e-05
cg08119219	-0.0285	0.971902	19	11164311	SMARCA4;SMARCA4;SMARCA4;SMARCA4;SMARCA4;SMARCA4;SMARCA4	Body;Body;Body;Body;Body;Body;Body	NA	7.27117e-06
cg08121025	0.0235986	1.02388	14	54976315	CGRRF1	TSS1500	Island	3.62249e-07
cg08164006	-0.0362869	0.964364	9	139086145	NA	NA	Island	1.11674e-05
cg08166019	-0.0420346	0.958837	7	1264549	NA	NA	N_Shore	1.03216e-05
cg08220278	-0.0246019	0.975698	1	180137345	QSOX1;QSOX1	Body;Body	NA	2.22413e-05
cg08302155	-0.0284611	0.97194	11	6579391	DNHD1	Body	NA	4.46842e-05
cg08327999	-0.0582193	0.943443	11	131104406	NA	NA	NA	2.69207e-05
cg08331345	-0.0283352	0.972062	16	28995882	LAT;LAT;LAT;LAT	TSS1500;TSS1500;TSS1500;TSS1500	NA	1.44192e-05
cg08334310	0.0278579	1.02825	6	28555337	SCAND3	TSS1500	S_Shore	2.31595e-05
cg08352292	0.0329515	1.0335	17	27503756	MYO18A;MYO18A	5'UTR;5'UTR	Island	3.07797e-06
cg08376016	0.0307285	1.03121	6	44232957	NFKBIE	1stExon	Island	1.62821e-05
cg08390079	-0.0247012	0.975601	14	69347566	ACTN1;ACTN1;ACTN1	Body;Body;Body	NA	4.36008e-08
cg08408433	-0.0551957	0.9463	19	47127358	PTGIR	Body	Island	8.99479e-06
cg08426597	-0.073252	0.929367	5	2007128	NA	NA	N_Shore	1.39997e-06
cg08442934	-0.0321452	0.968366	4	1773246	NA	NA	S_Shore	8.46361e-06
cg08449348	-0.0156643	0.984458	5	38673959	NA	NA	NA	9.02142e-06
cg08471950	-0.030283	0.970171	9	35712185	MIR6852;TLN1	TSS1500;Body	NA	2.2734e-05
cg08524197	-0.034637	0.965956	16	188850	C16orf35;C16orf35	TSS200;TSS1500	Island	4.7189e-07
cg08586066	0.0246479	1.02495	6	16238667	GMPR	TSS200	Island	2.90919e-05
cg08663890	-0.0300099	0.970436	1	111746277	NA	NA	N_Shore	1.58005e-05
cg08698271	0.0212791	1.02151	6	131949655	MED23;MED23;MED23;MED23	TSS1500;TSS1500;TSS1500;TSS1500	S_Shore	6.9981e-09
cg08701609	0.0365114	1.03719	21	34961305	DONSON	TSS1500	S_Shore	1.27208e-05
cg08705753	0.0326903	1.03323	12	27485144	ARNTL2;ARNTL2;ARNTL2;ARNTL2;ARNTL2	TSS1500;TSS1500;TSS1500;TSS1500;TSS1500	N_Shore	2.29749e-05
cg08706746	-0.0161313	0.983998	15	52975231	NA	NA	S_Shelf	2.15663e-05
cg08716769	0.0703509	1.07288	6	124442927	NKAIN2;NKAIN2;NKAIN2;NKAIN2	5'UTR;5'UTR;Body;Body	NA	5.86438e-05
cg08754560	-0.02144	0.978788	10	97597843	ENTPD1;ENTPD1-AS1;ENTPD1;ENTPD1;ENTPD1;ENTPD1;ENTPD1;ENTPD1	Body;Body;5'UTR;Body;5'UTR;5'UTR;Body;Body	NA	5.90865e-05
cg08757531	0.0359346	1.03659	15	83654895	FAM103A1	TSS200	Island	1.11838e-05
cg08799608	-0.0180224	0.982139	21	40816081	LCA5L;LCA5L	1stExon;5'UTR	N_Shore	5.32426e-05
cg08820025	-0.0361222	0.964522	22	46274116	NA	NA	N_Shelf	9.005e-07
cg08826738	0.0295237	1.02996	6	105585351	BVES;BVES	TSS1500;TSS1500	Island	4.94681e-06
cg08883213	-0.0401507	0.960645	19	55728836	NA	NA	S_Shore	2.182e-06
cg08889394	0.0701021	1.07262	11	66278839	BBS1	Body	NA	1.98663e-06
cg08945467	-0.0138674	0.986228	1	58522070	DAB1	5'UTR	NA	9.36728e-06
cg08950537	-0.0343643	0.966219	10	95361933	RBP4	TSS1500	S_Shore	2.88286e-05
cg08973382	-0.0202867	0.979918	2	74728623	LOC151534;LBX2	TSS1500;Body	N_Shore	3.26884e-05
cg08992050	0.0392736	1.04006	12	44152940	IRAK4;PUS7L;IRAK4;PUS7L;PUS7L;IRAK4;IRAK4;IRAK4	5'UTR;TSS1500;5'UTR;TSS1500;TSS1500;5'UTR;5'UTR;5'UTR	S_Shore	1.58815e-05
cg08995467	-0.0171222	0.983024	21	10922885	TPTE;TPTE;TPTE;TPTE	Body;Body;Body;Body	NA	5.46527e-09
cg09131151	-0.0419871	0.958882	11	133782453	NA	NA	NA	9.39903e-06
cg09214699	-0.0205307	0.979679	5	6366106	NA	NA	NA	5.10223e-05
cg09247521	-0.0284902	0.971912	4	16258287	TAPT1-AS1;TAPT1-AS1	Body;Body	S_Shore	1.43977e-06
cg09275986	-0.0285696	0.971835	1	6035793	NPHP4	Body	NA	3.10044e-05
cg09303423	-0.030503	0.969957	10	12976991	CCDC3;CCDC3	Body;Body	NA	2.10644e-05
cg09359106	0.0524048	1.0538	1	204043642	SOX13	5'UTR	Island	3.38715e-06
cg09368755	-0.0245039	0.975794	18	39605873	PIK3C3;PIK3C3	Body;Body	NA	3.68145e-05
cg09434115	-0.0227152	0.977541	13	37679951	CSNK1A1L	TSS200	NA	5.97045e-06
cg09451549	-0.0123061	0.987769	19	8386408	RPS28;NDUFA7;RPS28	5'UTR;TSS200;1stExon	Island	4.20695e-05
cg09459868	-0.0322501	0.968264	17	60459141	EFCAB3;EFCAB3	Body;5'UTR	NA	1.69412e-05
cg09512080	-0.0134088	0.986681	7	94286219	SGCE;PEG10;SGCE;PEG10;SGCE	TSS1500;5'UTR;TSS1500;5'UTR;TSS1500	Island	1.29218e-05
cg09520554	-0.0213197	0.978906	2	15830021	NA	NA	NA	6.06753e-07
cg09537216	-0.0202843	0.97992	5	72801264	BTF3;BTF3	3'UTR;3'UTR	NA	2.96586e-05
cg09548501	-0.065649	0.93646	2	151188760	NA	NA	NA	4.65125e-05
cg09553606	-0.0216466	0.978586	12	7362698	PEX5;PEX5;PEX5;PEX5;PEX5;PEX5	Body;Body;Body;Body;Body;Body	NA	5.24188e-05
cg09620331	0.0329333	1.03348	5	68485282	CENPH	TSS200	Island	5.76409e-05
cg09694610	0.0234776	1.02376	20	36156532	BLCAP;BLCAP;BLCAP;BLCAP	TSS200;TSS1500;TSS200;TSS1500	Island	5.19016e-05
cg09830203	-0.0229687	0.977293	19	8569300	NA	NA	N_Shore	3.10837e-05
cg09853467	-0.0238096	0.976472	2	23824418	KLHL29	Body	NA	2.91024e-05
cg09856467	-0.0234409	0.976832	22	26938937	TPST2;TPST2	5'UTR;5'UTR	S_Shore	1.71456e-06
cg09861350	-0.0953774	0.90903	4	66537597	EPHA5;EPHA5;EPHA5;EPHA5;EPHA5;EPHA5-AS1;EPHA5-AS1	TSS1500;TSS1500;TSS1500;TSS1500;TSS1500;ExonBnd;Body	S_Shore	1.01896e-05
cg09921385	-0.0221119	0.978131	4	7000882	TBC1D14;TBC1D14;TBC1D14;TBC1D14	Body;Body;Body;Body	NA	1.88905e-05
cg09928842	0.0474105	1.04855	8	135845050	NA	NA	Island	4.13882e-07
cg09961083	-0.0167686	0.983371	14	75761431	NA	NA	S_Shore	5.48935e-05
cg09961137	-0.0299353	0.970508	2	88474169	THNSL2;THNSL2;THNSL2;THNSL2;THNSL2	ExonBnd;ExonBnd;5'UTR;Body;Body	S_Shelf	4.21281e-05
cg09967373	-0.0311949	0.969287	9	89865000	NA	NA	NA	2.24865e-05
cg10020040	-0.0306995	0.969767	1	3397621	ARHGEF16	3'UTR	S_Shelf	5.16271e-05
cg10023454	-0.0310386	0.969438	1	180137918	QSOX1;QSOX1	Body;Body	NA	5.95702e-05
cg10075584	0.0130393	1.01312	3	130613286	ATP2C1;ATP2C1;ATP2C1;ATP2C1;ATP2C1;ATP2C1;ATP2C1;ATP2C1;ATP2C1;ATP2C1;ATP2C1	5'UTR;5'UTR;5'UTR;5'UTR;TSS200;TSS200;TSS200;TSS200;Body;Body;Body	Island	5.32794e-05
cg10085948	-0.0591777	0.942539	5	145774753	NA	NA	NA	1.28881e-05
cg10135894	0.0309975	1.03148	4	7862655	AFAP1;AFAP1	Body;Body	NA	5.73168e-05
cg10143812	-0.0531572	0.948231	10	133501396	NA	NA	NA	5.72602e-06
cg10160807	-0.0608913	0.940926	4	3677497	NA	NA	NA	1.1574e-06
cg10186802	-0.0257047	0.974623	8	23275182	NA	NA	NA	5.88857e-05
cg10190686	-0.0268923	0.973466	16	19388171	NA	NA	NA	5.26865e-05
cg10199040	-0.0134638	0.986626	1	89592995	GBP2	TSS1500	NA	2.67499e-06
cg10211518	0.030159	1.03062	19	633735	POLRMT	TSS200	S_Shore	3.81959e-05
cg10256234	-0.0137913	0.986303	11	66624034	LRFN4;PC;PC;PC	TSS1500;Body;Body;Body	Island	3.38287e-06
cg10270306	-0.0602538	0.941526	6	151561032	AKAP12	TSS200	N_Shore	1.39e-05
cg10332934	-0.0741167	0.928563	16	88210473	NA	NA	NA	1.8281e-06
cg10339295	-0.0385762	0.962158	14	101942203	NA	NA	NA	7.53037e-06
cg10369796	0.0344206	1.03502	8	22550379	EGR3	1stExon	Island	1.14664e-05
cg10459585	-0.0190331	0.981147	8	142106211	NA	NA	NA	1.77949e-05
cg10462416	0.0341266	1.03472	10	103912579	NOLC1	Body	S_Shore	4.93909e-06
cg10501263	-0.0217687	0.978467	1	52437503	RAB3B	Body	NA	2.64046e-05
cg10510557	-0.0233279	0.976942	16	71168874	HYDIN;HYDIN	Body;Body	NA	5.90104e-05
cg10692436	-0.0307937	0.969676	12	113670705	TPCN1;TPCN1	Body;Body	NA	3.13993e-05
cg10705675	-0.0310434	0.969433	22	45351789	PHF21B;PHF21B;PHF21B;PHF21B	Body;Body;Body;5'UTR	NA	7.79233e-06
cg10726312	-0.0202289	0.979974	2	85837083	C2orf68	Body	N_Shore	1.78429e-06
cg10735529	0.035089	1.03571	12	101801294	ARL1;ARL1	Body;Body	Island	1.86749e-06
cg10750182	-0.0282859	0.97211	10	73497514	C10orf105;C10orf105;CDH23	5'UTR;1stExon;Body	NA	2.66434e-05
cg10776077	0.0292344	1.02967	6	33216766	NA	NA	Island	3.67134e-07
cg10791955	0.02294	1.02321	6	126307701	TRMT11	1stExon	Island	5.86116e-05
cg10815453	-0.033008	0.967531	21	45122781	NA	NA	NA	3.44143e-05
cg10819495	0.077002	1.08004	8	75735552	PI15	TSS1500	NA	2.40474e-05
cg10829227	-0.0226455	0.977609	19	47200595	PRKD2;PRKD2;PRKD2;PRKD2	Body;Body;Body;Body	S_Shelf	4.92722e-06
cg10860019	-0.0802153	0.922918	2	121426120	NA	NA	NA	8.0977e-06
cg10879843	-0.0320334	0.968474	7	47608299	TNS3	5'UTR	NA	3.95352e-05
cg10896616	-0.030316	0.970139	5	1295267	TERT;TERT	TSS200;TSS200	Island	2.71678e-05
cg10926564	-0.0237155	0.976564	20	23123362	NA	NA	NA	2.91118e-05
cg10935898	-0.0291713	0.97125	16	3065923	CLDN6	Body	N_Shore	2.96994e-05
cg10938436	-0.0253712	0.974948	11	124616066	NRGN;NRGN	3'UTR;3'UTR	Island	1.23195e-06
cg10975863	-0.0285197	0.971883	14	68830704	RAD51L1;RAD51L1;RAD51L1	Body;Body;Body	NA	2.95307e-06
cg10994511	0.0236225	1.0239	5	7396002	ADCY2	TSS1500	Island	2.70132e-06
cg11029053	0.041968	1.04286	11	8008725	EIF3F	TSS200	N_Shore	4.13919e-05
cg11067407	-0.0203904	0.979816	11	113599852	NA	NA	NA	1.69962e-05
cg11081729	0.0293823	1.02982	19	53662467	ZNF347	TSS200	Island	2.23266e-05
cg11193064	-0.0295314	0.9709	15	67008444	SMAD6;SMAD6	Body;Body	NA	4.90925e-06
cg11224251	0.0261024	1.02645	12	6335277	CD9	Body	NA	2.56582e-05
cg11247887	-0.0253832	0.974936	4	10346979	NA	NA	NA	2.38922e-05
cg11248653	-0.0237365	0.976543	9	140637931	EHMT1;EHMT1	Body;Body	NA	2.7168e-05
cg11261667	-0.0441016	0.956857	19	15132411	CCDC105	Body	Island	1.61628e-09
cg11334692	0.0185756	1.01875	6	31633745	CSNK2B;BAT4;CSNK2B	1stExon;TSS1500;5'UTR	Island	6.09108e-05
cg11344668	0.0593416	1.06114	7	75677322	STYXL1;MDH2	TSS200;TSS200	Island	7.0222e-08
cg11367136	0.0337773	1.03435	19	12834660	TNPO2;TNPO2;TNPO2	1stExon;5'UTR;TSS1500	Island	1.74261e-05
cg11369172	0.0175009	1.01765	7	132766939	CHCHD3	TSS200	Island	3.38593e-05
cg11407290	0.0207876	1.02101	19	39420982	MRPS12;MRPS12;SARS2;SARS2;MRPS12	TSS1500;TSS1500;Body;Body;TSS1500	N_Shore	1.08732e-06
cg11435841	0.0373529	1.03806	19	38908926	RASGRP4;RASGRP4;RASGRP4;RASGRP4;RASGRP4;RASGRP4;RASGRP4	Body;Body;Body;Body;Body;Body;Body	Island	4.5136e-05
cg11439192	-0.0415346	0.959316	6	32806182	TAP2;TAP2	5'UTR;5'UTR	N_Shore	3.94807e-05
cg11473509	-0.032448	0.968073	9	112213987	PTPN3;PTPN3;PTPN3;PTPN3	TSS1500;TSS1500;Body;Body	NA	1.74163e-06
cg11476758	0.0538716	1.05535	14	73525614	RBM25	5'UTR	Island	1.60625e-05
cg11482376	0.0279891	1.02838	11	124709245	NA	NA	Island	4.19218e-06
cg11525834	-0.0204975	0.979711	7	73153318	ABHD11;ABHD11;ABHD11;ABHD11;ABHD11;ABHD11;ABHD11	TSS200;TSS200;TSS200;TSS200;TSS200;TSS200;TSS200	Island	9.89669e-07
cg11527921	-0.0254278	0.974893	2	166754028	TTC21B	Body	NA	9.55215e-06
cg11542469	0.0208419	1.02106	11	111957496	SDHD;TIMM8B;TIMM8B;TIMM8B	TSS200;1stExon;5'UTR;Body	Island	6.0398e-06
cg11574469	0.0274832	1.02786	6	72130615	C6orf155	TSS200	Island	5.54824e-05
cg11597887	-0.0543324	0.947117	14	30121437	MIR548AI;PRKD1	Body;Body	NA	3.89825e-05
cg11609578	0.0238337	1.02412	6	30796312	NA	NA	NA	5.28785e-05
cg11647478	-0.0380767	0.962639	6	170497869	NA	NA	NA	3.23587e-06
cg11696789	0.0233712	1.02365	11	66024647	KLC2;KLC2;KLC2;KLC2	TSS1500;TSS200;TSS1500;TSS1500	N_Shore	9.78663e-06
cg11706746	0.0299102	1.03036	11	62389756	B3GAT3	TSS1500	Island	2.02628e-08
cg11715991	-0.0555618	0.945954	1	55012926	ACOT11;ACOT11	TSS1500;TSS1500	NA	6.06492e-06
cg11728546	-0.0256456	0.97468	10	114055566	TECTB	Body	NA	9.82984e-08
cg11753750	-0.0293989	0.971029	22	39147792	UNC84B	Body	N_Shelf	2.93678e-06
cg11765288	0.0497189	1.05098	7	18535767	HDAC9;HDAC9;HDAC9;HDAC9;HDAC9	TSS200;5'UTR;5'UTR;TSS200;TSS200	NA	5.25887e-06
cg11792186	-0.0280628	0.972327	7	2083105	MAD1L1;MAD1L1;MAD1L1	Body;Body;Body	NA	2.11523e-08
cg11807261	-0.0287393	0.97167	4	13991309	NA	NA	NA	3.55685e-05
cg11838299	0.0331814	1.03374	11	7041752	NLRP14;ZNF214;NLRP14	1stExon;TSS200;5'UTR	Island	1.19524e-05
cg11844827	0.0288842	1.02931	7	26240340	HNRNPA2B1;HNRNPA2B1;CBX3;CBX3;HNRNPA2B1;HNRNPA2B1	1stExon;1stExon;TSS1500;TSS1500;5'UTR;5'UTR	Island	1.68498e-05
cg11861591	-0.0256431	0.974683	11	71815208	LAMTOR1;LRTOMT;LRTOMT;LRTOMT	TSS1500;Body;Body;Body	S_Shore	2.19053e-06
cg11932158	-0.0283246	0.972073	3	155422129	PLCH1	TSS200	NA	2.92668e-05
cg11997486	-0.0263431	0.974001	6	14100671	NA	NA	NA	3.55836e-05
cg12006733	-0.104599	0.900686	15	90177014	KIF7	Body	NA	2.16589e-05
cg12026858	-0.0331235	0.967419	11	114067446	ZBTB16;ZBTB16	Body;Body	N_Shelf	6.76042e-10
cg12107714	-0.0321466	0.968365	17	1940023	DPH1	Body	NA	4.96557e-05
cg12152256	0.0246879	1.025	14	74353709	ZNF410	5'UTR	Island	4.24901e-06
cg12173620	0.0314954	1.032	19	49956415	PIH1D1;ALDH16A1;ALDH16A1	TSS1500;TSS200;TSS200	Island	3.04793e-05
cg12190057	0.0294439	1.02988	16	53469041	RBL2	Body	Island	8.04262e-06
cg12249789	-0.0275392	0.972837	21	45203404	NA	NA	N_Shelf	3.4242e-06
cg12287025	0.0303084	1.03077	11	44087605	ACCS;ACCS	TSS200;TSS1500	Island	2.46139e-05
cg12289885	0.0715624	1.07419	15	74423383	ISLR2;ISLR2;ISLR2;ISLR2	5'UTR;5'UTR;5'UTR;5'UTR	N_Shore	5.26898e-06
cg12298872	-0.0219851	0.978255	1	228352449	C1orf69	TSS1500	N_Shore	3.07639e-05
cg12303610	-0.0251466	0.975167	22	50636559	TRABD	Body	Island	7.82184e-06
cg12323894	0.0348533	1.03547	2	120124007	DBI;C2orf76;DBI;C2orf76;DBI	TSS1500;5'UTR;TSS1500;1stExon;TSS1500	N_Shore	2.42187e-05
cg12339328	-0.0261448	0.974194	20	18491484	SEC23B;SEC23B;SEC23B	Body;Body;Body	S_Shelf	2.61535e-06
cg12372745	-0.0570179	0.944577	20	62187666	C20orf195	Body	Island	4.72415e-05
cg12400790	-0.0259351	0.974398	7	2635181	IQCE;IQCE	Body;Body	S_Shelf	3.57592e-05
cg12409601	0.0504762	1.05177	1	45265955	PLK3	TSS200	Island	1.74976e-05
cg12424345	0.0292621	1.02969	6	109330972	SESN1	Body	Island	8.1315e-09
cg12426640	-0.0286505	0.971756	3	38415918	XYLB	Body	NA	4.18392e-05
cg12468056	0.0227676	1.02303	8	41909961	MYST3;MYST3;MYST3	TSS1500;TSS1500;TSS1500	Island	5.63362e-05
cg12513616	-0.0226544	0.9776	5	177370977	NA	NA	Island	3.33041e-05
cg12584257	-0.0494205	0.951781	9	136475163	NA	NA	S_Shore	1.68455e-05
cg12590902	-0.0236763	0.976602	1	44771985	ERI3	Body	NA	1.01566e-07
cg12631586	-0.0298855	0.970557	4	6941677	TBC1D14;TBC1D14	Body;Body	NA	2.25098e-06
cg12660445	-0.0276593	0.97272	15	66795737	SNORD18A;RPL4;SNORD18B;SNORD16	TSS200;Body;TSS1500;TSS1500	NA	4.3005e-05
cg12664056	-0.0407268	0.960091	1	166890924	ILDR2	Body	S_Shore	2.75637e-05
cg12680750	-0.104113	0.901124	2	133426182	LYPD1;LYPD1	5'UTR;Body	N_Shore	7.9204e-07
cg12693975	0.0197344	1.01993	3	50388659	TUSC4;CYB561D2	TSS200;5'UTR	Island	4.64559e-05
cg12709516	-0.036342	0.96431	8	88886508	DCAF4L2	TSS1500	S_Shore	4.29806e-05
cg12814525	0.0267184	1.02708	6	30685250	MDC1;MDC1	1stExon;5'UTR	Island	6.06744e-06
cg12855851	-0.0299671	0.970477	6	41715185	PGC;PGC	TSS200;TSS200	NA	4.18409e-05
cg12877278	0.117055	1.12418	6	151551059	LOC102723831	TSS1500	NA	3.58768e-07
cg12883980	-0.0523234	0.949022	13	50707586	NA	NA	Island	4.126e-06
cg12886492	-0.104483	0.90079	5	91253642	NA	NA	NA	6.50731e-07
cg12923919	0.0426186	1.04354	7	27166760	HOXA3;HOXA-AS2	TSS200;Body	N_Shelf	1.38568e-06
cg12964848	-0.0916932	0.912385	4	42717892	NA	NA	NA	6.21178e-06
cg12972081	-0.0296231	0.970811	5	140807490	PCDHGA4;PCDHGA11;PCDHGA11;PCDHGA9;PCDHGA1;PCDHGB1;PCDHGB8P;PCDHGB6;PCDHGB3;PCDHGB7;PCDHGA6;PCDHGA8;PCDHGA10;PCDHGA5;PCDHGB4;PCDHGA3;PCDHGA2;PCDHGB2;PCDHGA7;PCDHGB5	Body;Body;Body;Body;Body;Body;Body;Body;Body;Body;Body;Body;Body;Body;Body;Body;Body;Body;Body;Body	Island	7.77395e-06
cg13029130	-0.0402824	0.960518	2	68593246	PLEK	Body	NA	1.74568e-05
cg13031029	-0.123985	0.883393	7	107574783	LAMB1	Body	NA	3.33521e-06
cg13033898	-0.048971	0.952209	6	151561055	AKAP12	TSS200	N_Shore	3.94944e-05
cg13035668	0.047899	1.04906	3	117587400	NA	NA	NA	1.08002e-05
cg13043300	-0.0271555	0.97321	11	71146211	DHCR7;DHCR7	3'UTR;3'UTR	N_Shore	5.75934e-05
cg13047067	-0.0765298	0.926325	6	168063253	NA	NA	Island	1.19896e-06
cg13049152	-0.0682258	0.93405	2	139716619	NA	NA	NA	1.52946e-05
cg13065497	-0.0342407	0.966339	11	69969022	ANO1;ANO1	Body;Body	NA	2.89977e-05
cg13070535	-0.0957212	0.908717	2	124202350	NA	NA	NA	1.89354e-15
cg13124370	0.059108	1.06089	4	22517059	GPR125	Body	Island	4.73666e-05
cg13149140	0.0757224	1.07866	9	19380280	RPS6	TSS200	Island	1.13034e-05
cg13150467	0.0411623	1.04202	4	145567373	HHIP;HHIP	1stExon;5'UTR	Island	5.63104e-06
cg13157098	0.030128	1.03059	5	36876867	NIPBL-AS1;NIPBL;NIPBL;NIPBL;NIPBL	TSS200;1stExon;1stExon;5'UTR;5'UTR	Island	8.14869e-08
cg13167196	-0.0185036	0.981667	2	190398604	NA	NA	NA	4.14928e-05
cg13206941	-0.0188308	0.981345	4	185781248	NA	NA	NA	2.63814e-05
cg13268671	0.024938	1.02525	2	166810585	TTC21B	TSS1500	Island	5.32966e-05
cg13279956	-0.0207246	0.979489	11	55653268	SPRYD5	Body	NA	1.46473e-05
cg13332816	0.0398115	1.04061	5	137911760	HSPA9	TSS1500	S_Shore	2.88496e-05
cg13338989	-0.0251558	0.975158	19	44253678	SMG9	Body	NA	3.54451e-05
cg13357496	0.0252213	1.02554	17	33288906	ZNF830;CCT6B	1stExon;TSS1500	Island	7.00209e-07
cg13392422	-0.0674857	0.934741	6	17032554	NA	NA	NA	7.21043e-07
cg13455439	-0.0448829	0.956109	11	69934128	ANO1;ANO1	Body;Body	Island	6.2651e-07
cg13460980	-0.0252095	0.975106	2	55746328	CCDC104	TSS1500	N_Shore	1.03622e-05
cg13474450	-0.0267535	0.973601	8	142222685	SLC45A4	Body	S_Shore	4.59151e-08
cg13510360	-0.0265709	0.973779	9	139795609	TRAF2	Body	NA	3.04058e-05
cg13523132	-0.0311384	0.969341	9	139638566	LCN6;LCN10	3'UTR;TSS1500	N_Shelf	7.66968e-06
cg13524102	-0.0732639	0.929356	9	137915317	NA	NA	NA	4.69853e-06
cg13530442	-0.0319017	0.968602	1	8939736	ENO1-AS1;ENO1	Body;TSS1500	S_Shore	3.24917e-05
cg13536265	0.0369156	1.03761	14	24836539	NFATC4;NFATC4	Body;TSS1500	N_Shore	1.18633e-05
cg13551510	-0.0324831	0.968039	11	131560938	NTM	Body	Island	9.01422e-06
cg13552999	0.0255449	1.02587	14	89020850	PTPN21	5'UTR	Island	2.41161e-06
cg13557799	0.0603586	1.06222	17	1359749	CRK;CRK	TSS200;TSS200	Island	1.97199e-11
cg13563661	0.043915	1.04489	8	144372842	ZNF696	TSS1500	N_Shore	1.93069e-06
cg13568586	-0.0389158	0.961832	4	170874222	LOC100506085	Body	NA	1.7537e-07
cg13581752	-0.0909179	0.913093	5	180079228	NA	NA	S_Shelf	1.72204e-11
cg13590130	-0.0422773	0.958604	5	1922065	NA	NA	NA	4.54459e-07
cg13592245	-0.0321929	0.96832	4	151236500	LRBA;LRBA	Body;Body	NA	2.45043e-05
cg13606440	-0.0287881	0.971622	2	55378199	NA	NA	NA	4.25157e-06
cg13612274	0.0145239	1.01463	14	90085330	FOXN3	5'UTR	N_Shore	2.55956e-05
cg13640145	-0.0636733	0.938311	4	122685651	LOC100192379;TMEM155	TSS200;5'UTR	N_Shore	1.65121e-05
cg13647725	-0.0267063	0.973647	11	69241093	NA	NA	NA	3.72031e-05
cg13653391	-0.0405199	0.96029	10	134896691	NA	NA	Island	3.88003e-05
cg13660279	-0.0296363	0.970799	16	54318221	IRX3	Body	Island	3.84267e-06
cg13674556	0.0284846	1.02889	9	77702836	C9orf95;OSTF1;C9orf95;C9orf95	Body;TSS1500;5'UTR;5'UTR	N_Shore	2.88543e-05
cg13692482	-0.129665	0.87839	9	130168651	SLC2A8	Body	S_Shore	2.03647e-08
cg13700148	-0.054139	0.9473	7	63043422	NA	NA	S_Shelf	5.38082e-05
cg13712518	-0.0181074	0.982056	9	140001096	MAN1B1	Body	S_Shelf	5.17543e-07
cg13797824	-0.016212	0.983919	7	94286362	SGCE;PEG10;SGCE;PEG10;SGCE	TSS1500;5'UTR;TSS1500;5'UTR;TSS1500	Island	5.5987e-06
cg13808508	0.0359896	1.03665	9	94187090	NFIL3	TSS1500	Island	5.95942e-05
cg13861677	-0.0548098	0.946665	22	38823897	KCNJ4;KCNJ4	Body;Body	Island	6.24087e-07
cg13888036	-0.0576927	0.94394	4	3724863	NA	NA	NA	4.96723e-06
cg13929566	0.0212691	1.0215	6	152958173	SYNE1;SYNE1	5'UTR;TSS200	Island	5.7018e-05
cg13949920	-0.0443669	0.956603	21	45593048	NA	NA	NA	2.72411e-08
cg13950210	0.0406976	1.04154	1	45452319	EIF2B3;EIF2B3;EIF2B3;EIF2B3	1stExon;5'UTR;1stExon;5'UTR	Island	5.019e-05
cg13951948	0.0248254	1.02514	16	30546188	ZNF747;ZNF747	5'UTR;1stExon	Island	4.80823e-05
cg14000226	-0.0112626	0.988801	10	30998952	SVILP1	Body	NA	3.76869e-05
cg14006663	0.0325035	1.03304	10	3215076	PITRM1	TSS200	Island	1.90586e-05
cg14045652	-0.0517709	0.949546	13	106992789	NA	NA	NA	3.39788e-05
cg14162806	-0.0193705	0.980816	22	39641406	PDGFB	TSS1500	S_Shore	2.79677e-06
cg14166880	-0.080712	0.922459	4	12660023	NA	NA	NA	1.47015e-06
cg14242895	-0.039906	0.96088	11	118393450	MLL	3'UTR	NA	3.22322e-08
cg14292368	0.0385843	1.03934	19	18793705	CRTC1;CRTC1	TSS1500;TSS1500	N_Shore	1.98959e-05
cg14319657	-0.0346542	0.965939	22	48027921	NA	NA	S_Shore	5.38205e-06
cg14331199	-0.0212821	0.978943	20	35986463	SRC;SRC	5'UTR;5'UTR	NA	1.63673e-05
cg14346316	0.0221541	1.0224	11	125495727	CHEK1;CHEK1;CHEK1;CHEK1;CHEK1;CHEK1;CHEK1;CHEK1;CHEK1	TSS1500;TSS1500;1stExon;1stExon;1stExon;5'UTR;5'UTR;5'UTR;Body	Island	3.73212e-05
cg14359804	0.0231562	1.02343	6	11172266	NA	NA	NA	2.48127e-08
cg14387634	-0.0149807	0.985131	9	46275364	NA	NA	NA	5.06869e-05
cg14427694	0.050904	1.05222	7	30544570	GGCT	TSS200	Island	4.50396e-05
cg14434103	-0.0397038	0.961074	22	21011792	NA	NA	NA	3.70545e-06
cg14463333	-0.0506515	0.95061	10	101120670	CNNM1	Body	NA	5.96951e-06
cg14472131	-0.0217816	0.978454	3	63980967	ATXN7;ATXN7;ATXN7	Body;Body;Body	NA	3.32605e-05
cg14571192	0.0316	1.0321	1	85156339	SSX2IP;SSX2IP;SSX2IP;SSX2IP;SSX2IP	TSS200;TSS200;TSS200;TSS200;TSS200	Island	5.33994e-05
cg14578500	-0.0276282	0.97275	17	43191793	PLCD3	Body	NA	3.19628e-05
cg14605559	0.0238869	1.02417	7	100027059	MEPCE;ZCWPW1	TSS1500;TSS1500	Island	8.79064e-06
cg14619560	0.0374184	1.03813	9	33076428	SMU1	Body	N_Shore	5.57104e-06
cg14681958	-0.030357	0.970099	11	626729	SCT	Body	Island	5.99677e-05
cg14684581	-0.0201908	0.980012	8	11627124	NEIL2;NEIL2;NEIL2;NEIL2	TSS200;TSS200;TSS200;TSS200	Island	3.42361e-05
cg14689099	-0.0346102	0.965982	9	114385118	NA	NA	NA	1.64396e-05
cg14702809	0.0294559	1.02989	22	50497822	MLC1;MLC1	3'UTR;3'UTR	S_Shore	3.293e-05
cg14705232	-0.015184	0.984931	3	17208032	TBC1D5;TBC1D5	Body;Body	NA	3.14663e-05
cg14729930	-0.0271188	0.973246	17	38345453	RAPGEFL1	Body	N_Shelf	1.92993e-05
cg14753432	-0.041171	0.959665	11	44324833	ALX4	Body	N_Shore	4.58564e-05
cg14753599	-0.0234851	0.976789	10	88728361	C10orf116	1stExon	Island	3.67745e-05
cg14782437	0.0264761	1.02683	12	4381731	CCND2	TSS1500	Island	3.28612e-05
cg14870383	0.0251399	1.02546	12	7126003	LPCAT3	TSS200	Island	5.9766e-05
cg14872583	-0.0523454	0.949001	1	160208488	DCAF8;DCAF8;DCAF8	Body;Body;Body	NA	1.96992e-05
cg14896695	0.03393	1.03451	10	43902999	HNRNPF;HNRNPF;HNRNPF;HNRNPF	5'UTR;5'UTR;5'UTR;5'UTR	Island	4.99798e-05
cg14928510	-0.0332283	0.967318	19	55449439	NLRP7;NLRP7;NLRP7	Body;Body;Body	N_Shore	1.96391e-05
cg14929207	-0.024861	0.975446	17	27230533	DHRS13	TSS1500	S_Shore	1.09003e-05
cg14950616	-0.0212764	0.978948	1	47053057	MKNK1;MKNK1;MKNK1;MKNK1;MKNK1	Body;Body;Body;Body;Body	NA	3.41963e-05
cg15009750	-0.0266662	0.973686	19	35808702	NA	NA	NA	3.19534e-05
cg15027300	-0.0345673	0.966023	19	38877874	GGN	Body	Island	5.5684e-05
cg15030949	-0.0724272	0.930133	10	130844727	NA	NA	NA	1.23065e-05
cg15055883	-0.02026	0.979944	1	110583357	STRIP1;STRIP1;STRIP1	Body;Body;Body	NA	5.99374e-06
cg15059804	-0.0189111	0.981267	1	33766318	ZNF362	3'UTR	NA	1.54965e-05
cg15065912	-0.0200897	0.980111	22	47028248	GRAMD4	Body	S_Shore	2.54181e-05
cg15094104	0.0552525	1.05681	5	133406808	NA	NA	Island	4.44145e-06
cg15128876	-0.0256406	0.974685	1	161146073	B4GALT3	5'UTR	N_Shore	7.21629e-07
cg15146966	0.0503961	1.05169	22	29196915	XBP1;XBP1	TSS1500;TSS1500	Island	2.16502e-06
cg15194163	-0.0238748	0.976408	6	32118213	PRRT1	Body	Island	1.44768e-05
cg15227014	-0.0198977	0.980299	22	38037179	SH3BP1;SH3BP1	ExonBnd;Body	S_Shore	5.85061e-05
cg15267819	0.035775	1.03642	12	56367647	RAB5B;RAB5B;RAB5B	TSS200;TSS200;TSS200	Island	1.53617e-05
cg15271594	0.0348639	1.03548	3	52029932	RPL29;RPL29	1stExon;5'UTR	Island	3.22619e-06
cg15284129	-0.0751035	0.927647	12	1928689	LRTM2;LRTM2;LRTM2;CACNA2D4	TSS1500;TSS1500;TSS1500;Body	NA	3.24142e-05
cg15292101	0.0447402	1.04576	7	128431142	CCDC136	TSS1500	Island	2.38405e-06
cg15293824	-0.020711	0.979502	12	114380110	RBM19;RBM19;RBM19;RBM19;RBM19;RBM19	ExonBnd;ExonBnd;ExonBnd;Body;Body;Body	NA	2.25423e-06
cg15325978	0.0199956	1.0202	11	130318706	ADAMTS15	TSS200	Island	2.13406e-06
cg15336778	-0.0923093	0.911823	2	32853064	TTC27	TSS200	Island	8.78659e-06
cg15352841	0.020093	1.0203	2	28617672	FLJ31356;FOSL2	TSS200;Body	S_Shore	6.12685e-05
cg15416233	0.0291267	1.02956	10	102505266	PAX2;PAX2;PAX2;PAX2;PAX2	TSS1500;TSS1500;TSS1500;TSS1500;TSS1500	Island	3.73099e-05
cg15417498	0.0321244	1.03265	9	94187181	NFIL3	TSS1500	Island	4.02787e-05
cg15418593	-0.037642	0.963058	14	97492133	NA	NA	NA	4.00142e-05
cg15639951	-0.0212574	0.978967	17	43367609	MAP3K14	Body	NA	1.02243e-05
cg15646032	-0.0461543	0.954895	11	126522727	LOC101929427;KIRREL3;KIRREL3;KIRREL3	Body;Body;Body;Body	NA	3.59615e-07
cg15655599	-0.021502	0.978728	6	140365271	LOC100507477;LOC100507477	Body;Body	NA	1.50963e-05
cg15674193	-0.0300623	0.970385	2	238535910	LRRFIP1	TSS1500	Island	1.9223e-07
cg15686608	-0.0223208	0.977926	9	124461008	DAB2IP	Body	Island	5.46971e-05
cg15729578	-0.0270276	0.973334	3	195576390	NA	NA	NA	5.65305e-07
cg15828537	-0.0519588	0.949368	20	44099898	WFDC2	Body	S_Shore	1.61137e-05
cg15834517	0.0322283	1.03275	22	19929114	COMT;TXNRD2;TXNRD2	TSS200;Body;Body	Island	1.69336e-07
cg15841926	-0.0276933	0.972687	8	23275577	NA	NA	NA	6.77061e-06
cg15868426	0.0552645	1.05682	12	133563027	ZNF26	TSS200	Island	3.79785e-08
cg15871371	0.0246558	1.02496	3	71274624	FOXP1;FOXP1	5'UTR;5'UTR	NA	1.02538e-05
cg15914766	-0.0850879	0.918432	13	113660495	MCF2L;MCF2L	Body;Body	N_Shelf	1.6538e-12
cg15919605	-0.0190678	0.981113	5	150992767	NA	NA	NA	5.61139e-05
cg15961772	-0.0231093	0.977156	16	27225756	KDM8;KDM8	Body;Body	NA	2.99245e-06
cg15961775	-0.036712	0.963954	2	174806008	SP3;SP3;SP3	Body;Body;Body	NA	4.91361e-05
cg16021135	-0.0182287	0.981936	3	123130669	ADCY5;ADCY5	Body;Body	NA	1.50395e-05
cg16035840	-0.0313658	0.969121	5	95102505	RHOBTB3	Body	NA	1.02096e-06
cg16053443	-0.0349163	0.965686	3	195921147	NA	NA	NA	9.41502e-06
cg16054660	-0.0473488	0.953755	20	50481726	NA	NA	NA	2.62549e-05
cg16058444	0.0246604	1.02497	11	28128726	KIF18A;METTL15;METTL15;METTL15	5'UTR;TSS1500;TSS1500;TSS1500	N_Shelf	9.09073e-06
cg16064478	0.0371962	1.0379	15	75249807	RPP25	TSS200	Island	2.565e-05
cg16077991	0.0635675	1.06563	13	44454655	LACC1;LACC1;CCDC122	5'UTR;5'UTR;TSS1500	S_Shore	5.61372e-05
cg16085744	-0.0371818	0.963501	13	114744531	NA	NA	S_Shore	9.30888e-06
cg16102063	-0.0278277	0.972556	8	22298240	PPP3CC	TSS1500	Island	4.87021e-06
cg16108388	-0.0234934	0.97678	6	41704631	TFEB;PGC	TSS1500;Body	S_Shore	5.97791e-05
cg16144334	-0.0238931	0.97639	10	88769386	AGAP11	Body	N_Shore	1.97299e-05
cg16198734	-0.00960433	0.990442	2	202004649	CFLAR;CFLAR;CFLAR	Body;Body;Body	NA	4.05057e-05
cg16199289	0.0332999	1.03386	20	44447481	NA	NA	NA	5.05887e-05
cg16268233	-0.0725076	0.930059	5	136325112	SPOCK1	Body	NA	4.92187e-05
cg16288562	-0.0402325	0.960566	5	2111458	NA	NA	N_Shore	8.35187e-06
cg16307638	-0.019741	0.980453	1	24745267	NIPAL3	5'UTR	S_Shelf	1.56025e-05
cg16328882	-0.0271932	0.973173	14	55243069	SAMD4A;SAMD4A;SAMD4A	Body;Body;Body	NA	1.67744e-06
cg16375742	-0.0216979	0.978536	1	94169909	BCAR3	5'UTR	NA	1.05693e-05
cg16379316	0.0580542	1.05977	16	75019367	WDR59	TSS1500	S_Shore	6.14305e-08
cg16396933	-0.0252559	0.97506	10	104954103	NT5C2;NT5C2	TSS1500;TSS1500	S_Shore	2.84159e-05
cg16398417	-0.0274491	0.972924	9	130717709	FAM102A	Body	NA	2.90267e-05
cg16398956	-0.0216497	0.978583	14	100212958	NA	NA	NA	1.7869e-05
cg16403854	0.0269201	1.02729	17	27170014	C17orf63;C17orf63	TSS200;TSS200	S_Shore	2.26088e-05
cg16412986	0.0185205	1.01869	2	204400341	RAPH1;RAPH1	TSS1500;TSS1500	S_Shore	2.79474e-05
cg16421803	0.021377	1.02161	2	25194856	DNAJC27	TSS200	Island	7.7397e-06
cg16431095	-0.0155789	0.984542	8	28747829	HMBOX1;INTS9;INTS9;INTS9;INTS9;HMBOX1	TSS1500;TSS1500;TSS200;TSS200;TSS200;TSS200	N_Shore	2.37728e-05
cg16438722	-0.0864156	0.917213	14	101517458	MIR487A	TSS1500	NA	1.48964e-06
cg16480660	0.0548718	1.05641	15	99791485	LRRC28	TSS200	Island	1.12138e-07
cg16510040	-0.0426621	0.958235	1	40042432	PABPC4;PABPC4;PABPC4;PABPC4;PABPC4;PABPC4	5'UTR;5'UTR;1stExon;1stExon;1stExon;5'UTR	Island	2.28122e-05
cg16526445	0.0367869	1.03747	11	47270235	NR1H3;ACP2;ACP2	TSS1500;1stExon;1stExon	Island	3.018e-05
cg16553026	-0.0152183	0.984897	16	88020079	BANP;BANP	Body;Body	S_Shore	1.96245e-05
cg16747643	-0.0170262	0.983118	22	17517847	CECR7	Body	Island	3.86598e-05
cg16769623	-0.0510035	0.950275	9	115835613	NA	NA	Island	1.87718e-05
cg16772514	-0.0258363	0.974495	17	43046872	C1QL1	TSS1500	N_Shore	3.64776e-06
cg16808301	-0.0356631	0.964965	20	55968146	RBM38;RBM38;RBM38	Body;Body;Body	S_Shore	1.37214e-06
cg16813612	-0.0493197	0.951877	9	126861399	NA	NA	NA	1.36533e-06
cg16822754	-0.0374586	0.963234	15	42130883	PLA2G4B;JMJD7-PLA2G4B;JMJD7-PLA2G4B	TSS200;Body;Body	NA	5.59421e-08
cg16825173	0.0319187	1.03243	17	40828897	PLEKHH3;PLEKHH3	5'UTR;1stExon	S_Shore	5.27203e-05
cg16868066	-0.0293734	0.971054	15	42130989	PLA2G4B;JMJD7-PLA2G4B;JMJD7-PLA2G4B	TSS200;Body;Body	NA	1.69066e-06
cg16875632	-0.0208681	0.979348	6	20174468	MBOAT1;MBOAT1	Body;Body	NA	1.40473e-08
cg16904106	-0.0170522	0.983092	20	62521331	TPD52L2;TPD52L2;TPD52L2;TPD52L2;TPD52L2;TPD52L2;TPD52L2;TPD52L2;TPD52L2;TPD52L2;TPD52L2	Body;Body;3'UTR;3'UTR;3'UTR;3'UTR;3'UTR;3'UTR;3'UTR;3'UTR;3'UTR	NA	5.7383e-06
cg16915285	0.0350333	1.03565	4	55521081	NA	NA	N_Shelf	1.66451e-05
cg16932552	0.0333858	1.03395	2	63815797	MDH1;MDH1;MDH1;MDH1;WDPCP;WDPCP	5'UTR;1stExon;TSS1500;TSS1500;1stExon;5'UTR	Island	1.90498e-06
cg16936887	0.104892	1.11059	18	52989025	TCF4;TCF4;TCF4;TCF4;TCF4;TCF4;TCF4;TCF4;TCF4;TCF4;TCF4;TCF4;TCF4;TCF4;TCF4	1stExon;1stExon;5'UTR;5'UTR;Body;Body;Body;Body;Body;Body;Body;Body;Body;Body;Body	NA	5.2755e-05
cg17055489	-0.0239744	0.976311	6	143888190	LOC285740	Body	NA	2.8314e-05
cg17087974	-0.0300876	0.97036	11	65171397	FRMD8	Body	N_Shore	7.11601e-07
cg17187048	0.0442343	1.04523	2	122407283	CLASP1;CLASP1;CLASP1	TSS1500;TSS1500;TSS1500	Island	3.5699e-05
cg17216758	-0.0935745	0.91067	10	133834730	NA	NA	NA	3.51505e-05
cg17240701	-0.0100762	0.989974	4	96836082	NA	NA	NA	3.89636e-06
cg17253981	-0.0906452	0.913342	4	114366508	NA	NA	NA	4.63151e-05
cg17275109	0.0771847	1.08024	20	38955594	NA	NA	NA	3.87386e-05
cg17283601	0.0292034	1.02963	18	57567393	PMAIP1;PMAIP1	5'UTR;1stExon	Island	1.11054e-06
cg17297238	-0.0412552	0.959584	5	140871590	PCDHGA4;PCDHGC3;PCDHGA12;PCDHGA11;PCDHGA11;PCDHGA9;PCDHGA1;PCDHGB1;PCDHGB6;PCDHGB3;PCDHGB7;PCDHGA6;PCDHGA8;PCDHGA10;PCDHGA5;PCDHGB4;PCDHGC4;PCDHGA3;PCDHGA2;PCDHGA7;PCDHGB2;PCDHGC5;PCDHGB5;PCDHGC3	Body;Body;Body;Body;Body;Body;Body;Body;Body;Body;Body;Body;Body;Body;Body;Body;Body;Body;Body;Body;Body;Body;Body;Body	Island	3.64344e-10
cg17313244	-0.0159858	0.984141	2	96191428	NA	NA	N_Shore	4.83437e-05
cg17331566	-0.0192702	0.980914	1	44444305	B4GALT2	TSS1500	N_Shore	5.77502e-05
cg17337672	-0.030238	0.970215	10	123354171	FGFR2;FGFR2;FGFR2;FGFR2;FGFR2;FGFR2;FGFR2;FGFR2;FGFR2	5'UTR;5'UTR;TSS1500;5'UTR;TSS1500;5'UTR;5'UTR;TSS1500;5'UTR	N_Shelf	1.09128e-06
cg17338352	0.0284585	1.02887	4	123653805	LOC729338;BBS12	TSS200;TSS200	Island	2.44385e-06
cg17360140	0.0544426	1.05595	4	128886135	C4orf29;MFSD8	TSS1500;Body	Island	2.41416e-05
cg17406148	0.0393538	1.04014	7	87257356	RUNDC3B;RUNDC3B;ABCB1;RUNDC3B	TSS1500;TSS1500;5'UTR;TSS1500	Island	1.83382e-05
cg17455665	-0.0524163	0.948934	2	83749921	NA	NA	NA	5.3208e-07
cg17483410	-0.0273302	0.97304	1	155112791	DPM3;DPM3	5'UTR;1stExon	N_Shore	4.80955e-06
cg17483829	0.0587603	1.06052	1	169763977	METTL18;C1orf112;METTL18	5'UTR;TSS1500;1stExon	Island	3.51072e-06
cg17504468	-0.0282868	0.97211	1	243639494	SDCCAG8	Body	S_Shore	5.40359e-06
cg17520539	-0.0374994	0.963195	6	151560927	AKAP12	TSS1500	Island	9.67686e-07
cg17583499	-0.0720352	0.930498	5	878568	BRD9;BRD9;BRD9	Body;Body;Body	N_Shelf	2.7733e-05
cg17625601	-0.0760111	0.926806	8	35952625	NA	NA	NA	2.98656e-06
cg17679094	-0.025024	0.975286	4	8481207	NA	NA	NA	3.91375e-05
cg17687442	-0.028861	0.971551	2	178190964	LOC100130691	Body	NA	1.38196e-08
cg17716965	-0.0194075	0.98078	3	52260280	TLR9	TSS200	NA	3.27456e-05
cg17788149	-0.0199213	0.980276	20	42086235	SFRS6	TSS1500	Island	2.40717e-05
cg17839226	0.0885437	1.09258	1	225665763	NA	NA	S_Shelf	4.42036e-05
cg17867823	-0.0783216	0.924667	20	62191548	PRIC285;PRIC285	Body;Body	Island	7.34004e-06
cg17876429	-0.0218162	0.97842	1	8931674	ENO1;ENO1	TSS200;Body	NA	1.41352e-05
cg17914350	-0.0436864	0.957254	19	50986377	C19orf63;C19orf63	3'UTR;3'UTR	S_Shelf	1.98327e-06
cg17929130	-0.0196285	0.980563	20	62435354	ZBTB46	5'UTR	S_Shore	4.00568e-05
cg17937070	-0.0198506	0.980345	2	102766322	NA	NA	NA	5.92714e-05
cg17977133	-0.0697013	0.932672	18	77238512	NFATC1;NFATC1;NFATC1;NFATC1	Body;Body;Body;Body	N_Shore	1.62951e-05
cg17981091	-0.0205625	0.979647	3	127770706	SEC61A1	TSS1500	N_Shore	2.28904e-07
cg18005222	-0.0302129	0.970239	5	55008112	SLC38A9;SLC38A9	5'UTR;1stExon	Island	2.57793e-05
cg18042229	0.0348659	1.03548	2	219922729	IHH	Body	Island	3.31221e-05
cg18159324	0.0230803	1.02335	12	52463368	C12orf44;C12orf44	TSS1500;TSS1500	Island	1.62908e-06
cg18239858	-0.0208367	0.979379	7	101712363	CUX1;CUX1;CUX1	Body;Body;Body	NA	4.1578e-05
cg18241780	-0.018703	0.981471	12	118620216	TAOK3	Body	NA	2.66412e-05
cg18252067	0.0534626	1.05492	6	5085602	PPP1R3G;LOC100129461	TSS200;Body	Island	4.64986e-06
cg18277815	0.0192025	1.01939	4	6643729	MRFAP1	3'UTR	S_Shore	4.58708e-05
cg18278298	-0.0267764	0.973579	9	131528103	ZER1	5'UTR	NA	1.42578e-05
cg18297610	0.038408	1.03916	19	56165340	U2AF2;U2AF2	TSS200;TSS200	Island	2.64066e-05
cg18337525	-0.0513203	0.949974	6	45387854	RUNX2;RUNX2	Body;Body	Island	4.23516e-06
cg18344740	-0.0141359	0.985964	6	26322291	NA	NA	NA	3.54953e-05
cg18349281	-0.0380318	0.962682	19	4944398	UHRF1;UHRF1	Body;Body	Island	3.68908e-06
cg18361425	-0.0170838	0.983061	2	238795355	RAMP1	Body	NA	3.93627e-05
cg18449021	-0.0553004	0.946201	5	107004816	EFNA5	Body	N_Shore	3.06068e-05
cg18463174	0.0296063	1.03005	7	138794585	ZC3HAV1;ZC3HAV1	TSS200;TSS200	Island	1.48026e-05
cg18494018	0.0128601	1.01294	7	148581708	EZH2;EZH2	TSS1500;TSS1500	Island	3.41905e-05
cg18593668	0.0226165	1.02287	22	23411986	RTDR1;GNAZ	Body;TSS1500	N_Shore	3.80027e-05
cg18613866	-0.0437402	0.957203	12	40620159	LRRK2	Body	S_Shore	3.31456e-06
cg18614510	-0.0514978	0.949806	22	47081903	CERK	3'UTR	Island	1.02093e-06
cg18631996	-0.0409803	0.959848	5	139526080	NA	NA	Island	1.9444e-05
cg18633990	-0.0244407	0.975856	7	152559216	NA	NA	NA	3.76019e-05
cg18670564	0.0471496	1.04828	9	132244889	NA	NA	Island	8.42878e-06
cg18675381	0.0420223	1.04292	19	40950523	SERTAD3	TSS1500	Island	1.8078e-05
cg18703493	-0.0580362	0.943616	14	24361161	NA	NA	NA	8.15479e-06
cg18713364	-0.0194503	0.980738	11	44961359	TP53I11;TP53I11;TP53I11;TP53I11;TP53I11;TP53I11	5'UTR;5'UTR;5'UTR;5'UTR;5'UTR;5'UTR	NA	8.96792e-07
cg18783160	-0.0253571	0.974962	5	78100628	ARSB	Body	NA	2.32346e-05
cg18811907	-0.0217636	0.978472	22	38037190	SH3BP1;SH3BP1	ExonBnd;Body	S_Shore	2.42604e-05
cg18830721	0.0606071	1.06248	4	83821700	THAP9	TSS200	Island	2.61134e-06
cg18898693	0.0390769	1.03985	10	80829147	ZMIZ1	5'UTR	Island	6.54355e-06
cg18912001	-0.0387236	0.962017	19	55141424	LILRB1;LILRB1;LILRB1;LILRB1;LILRB1;LILRB1;LILRB1	TSS1500;TSS1500;TSS1500;TSS1500;TSS1500;TSS1500;5'UTR	NA	9.38233e-06
cg18950578	0.0186524	1.01883	13	48611561	NUDT15	TSS200	N_Shore	4.9136e-05
cg18954401	-0.0207121	0.979501	4	81124767	PRDM8;PRDM8	3'UTR;3'UTR	Island	1.125e-05
cg18956393	-0.0233265	0.976943	10	54074524	DKK1	Body	Island	1.36127e-05
cg19019321	0.0371506	1.03785	2	159826400	TANC1;TANC1	5'UTR;5'UTR	Island	9.67596e-06
cg19029220	0.0338719	1.03445	2	64067822	UGP2;UGP2	TSS1500;TSS1500	N_Shore	1.48271e-05
cg19033466	0.0322396	1.03276	6	144608035	NA	NA	Island	4.53185e-05
cg19054833	0.0232659	1.02354	19	1383453	NDUFS7	TSS1500	Island	4.22847e-06
cg19089102	-0.0175907	0.982563	6	116579888	NA	NA	NA	1.25911e-05
cg19149020	0.0571537	1.05882	10	15001078	MEIG1	TSS1500	N_Shore	3.56785e-05
cg19196777	-0.0279625	0.972425	19	34981326	WTIP	Body	NA	5.28402e-06
cg19221136	-0.0159785	0.984148	1	110950697	LAMTOR5;LAMTOR5-AS1	TSS200;Body	S_Shore	5.22914e-05
cg19237476	-0.0366411	0.964022	11	70501603	SHANK2;SHANK2	Body;Body	NA	7.39296e-06
cg19335327	-0.0165983	0.983539	19	57351642	MIMT1;PEG3;PEG3;ZIM2;PEG3;PEG3;ZIM2;ZIM2	TSS1500;5'UTR;5'UTR;5'UTR;5'UTR;5'UTR;5'UTR;5'UTR	Island	1.41542e-05
cg19376278	-0.0325329	0.967991	17	72780458	TMEM104	Body	NA	1.79662e-06
cg19422205	-0.0227698	0.977487	17	75404563	SEPT9;SEPT9;SEPT9;SEPT9;SEPT9	Body;Body;Body;Body;Body	NA	1.28594e-05
cg19452782	0.0367502	1.03743	3	101232218	SENP7;SENP7	TSS200;TSS200	S_Shore	2.30598e-05
cg19469373	0.0366553	1.03734	12	59461066	NA	NA	NA	5.4841e-05
cg19491427	0.02453	1.02483	11	18549103	TSG101	TSS1500	S_Shore	2.0545e-05
cg19514819	-0.0515766	0.949731	1	30435613	NA	NA	NA	1.19107e-06
cg19561774	-0.0789731	0.924065	6	160679690	SLC22A2	1stExon	Island	4.26166e-07
cg19593081	-0.015803	0.984321	3	108817414	MORC1	Body	NA	2.40656e-05
cg19595146	-0.0204364	0.979771	14	102480278	DYNC1H1	Body	N_Shore	9.52501e-07
cg19630539	0.0242869	1.02458	19	53426388	NA	NA	Island	2.94976e-06
cg19639367	-0.0288746	0.971538	6	30303612	TRIM39;TRIM39	Body;Body	NA	4.74799e-05
cg19676312	0.027869	1.02826	1	201951586	RNPEP	TSS200	N_Shore	2.8057e-05
cg19723436	-0.0357852	0.964848	17	80403254	C17orf62;C17orf62;C17orf62;C17orf62;C17orf62;C17orf62;C17orf62;C17orf62;C17orf62;C17orf62;C17orf62	Body;Body;Body;Body;Body;Body;Body;Body;Body;Body;Body	S_Shore	2.66221e-06
cg19748093	0.0364868	1.03716	1	113392388	NA	NA	Island	4.84307e-06
cg19755108	-0.0186947	0.981479	5	176434079	UIMC1	TSS1500	S_Shore	5.05853e-05
cg19801132	-0.0257741	0.974555	5	106316599	LOC102467213	Body	NA	1.12071e-05
cg19814686	-0.0228665	0.977393	19	45651596	NA	NA	N_Shelf	6.07008e-05
cg19815581	0.0577722	1.05947	6	151550918	LOC102723831	TSS1500	NA	6.04058e-08
cg19823512	-0.0233106	0.976959	1	203489725	NA	NA	NA	1.70252e-07
cg19842306	-0.0252479	0.975068	7	73996459	GTF2IRD1;GTF2IRD1;GTF2IRD1	Body;Body;Body	NA	4.86482e-05
cg19928138	0.0601198	1.06196	20	9570961	PAK7;PAK7	Body;Body	NA	3.78184e-05
cg19981796	-0.0209897	0.979229	19	7928066	EVI5L;EVI5L	Body;Body	Island	9.72675e-06
cg20015855	-0.0187667	0.981408	15	68937562	CORO2B	Body	NA	3.50589e-06
cg20019560	-0.0294683	0.970962	11	19156958	ZDHHC13;ZDHHC13	Body;5'UTR	NA	1.14083e-06
cg20045394	0.0257067	1.02604	17	36184576	NA	NA	NA	5.49494e-06
cg20068535	-0.0316647	0.968831	6	151560981	AKAP12	TSS200	Island	1.01941e-06
cg20091689	0.0363944	1.03706	2	97524862	ANKRD39	TSS1500	S_Shore	5.18708e-05
cg20107640	0.0276307	1.02802	3	53230203	NA	NA	Island	1.69764e-05
cg20126498	0.0758629	1.07881	22	44208202	EFCAB6;EFCAB6	TSS200;TSS200	Island	3.29742e-05
cg20136959	0.0471507	1.04828	13	49821950	CDADC1	TSS200	Island	5.29646e-06
cg20173011	-0.0252909	0.975026	8	101507705	NA	NA	NA	8.75332e-06
cg20227241	0.0252704	1.02559	17	7836253	CNTROB;CNTROB;CNTROB;CNTROB;TRAPPC1;TRAPPC1;TRAPPC1;TRAPPC1	5'UTR;5'UTR;1stExon;1stExon;TSS1500;TSS1500;TSS1500;TSS1500	S_Shore	6.71644e-07
cg20232550	-0.0484659	0.95269	8	144344793	ZFP41	3'UTR	NA	1.38061e-05
cg20243039	-0.057382	0.944233	4	21769727	KCNIP4	5'UTR	NA	6.06647e-05
cg20247708	0.0274128	1.02779	2	153032660	STAM2	TSS200	Island	4.49205e-05
cg20290527	0.0217671	1.02201	14	65453466	FNTB	TSS200	Island	1.31141e-07
cg20322685	-0.0438951	0.957054	7	97978097	BAIAP2L1	Body	NA	7.00792e-06
cg20382154	-0.0372113	0.963473	2	239463716	NA	NA	NA	5.56442e-05
cg20433386	-0.0251693	0.975145	17	48702158	CACNA1G;CACNA1G;CACNA1G;CACNA1G;CACNA1G;CACNA1G;CACNA1G;CACNA1G;CACNA1G;CACNA1G;CACNA1G;CACNA1G;CACNA1G;CACNA1G	Body;Body;Body;Body;Body;Body;Body;Body;Body;Body;Body;Body;Body;Body	NA	3.98664e-05
cg20519581	-0.0272931	0.973076	20	48959844	NA	NA	N_Shore	6.07514e-06
cg20529344	-0.0594384	0.942294	13	50707427	NA	NA	N_Shore	4.42629e-07
cg20560906	0.0226844	1.02294	3	47459876	SCAP	Body	Island	8.17054e-06
cg20615832	0.0382715	1.03901	4	74719172	PF4V1	1stExon	Island	4.17737e-05
cg20637915	-0.0244577	0.975839	12	132652520	NA	NA	N_Shore	1.35335e-05
cg20639011	-0.0192534	0.980931	5	132657596	FSTL4	Body	NA	3.82086e-05
cg20639890	0.024416	1.02472	15	25683349	UBE3A	5'UTR	Island	1.26483e-05
cg20657497	0.0221187	1.02237	20	44993182	SLC35C2;SLC35C2;SLC35C2	TSS200;TSS200;TSS200	S_Shore	2.55653e-06
cg20748065	-0.0238398	0.976442	7	75583421	POR	Body	NA	2.36522e-06
cg20755362	-0.0782622	0.924722	13	24072145	NA	NA	NA	7.09457e-07
cg20784950	-0.0283716	0.972027	8	145002522	PLEC1;PLEC1;PLEC1;PLEC1;PLEC1;PLEC1;PLEC1;PLEC1	Body;Body;Body;Body;Body;Body;Body;Body	N_Shore	1.04412e-05
cg20870340	-0.026578	0.973772	17	76972110	LGALS3BP	Body	NA	5.08646e-05
cg20884939	0.0272662	1.02764	10	116527795	NA	NA	Island	3.92456e-05
cg20888184	-0.0349045	0.965698	7	158253307	PTPRN2;PTPRN2;PTPRN2;PTPRN2;PTPRN2	Body;Body;Body;Body;Body	S_Shelf	5.05085e-06
cg20914958	-0.0501212	0.951114	10	99603398	LINC00866	Body	NA	5.18469e-05
cg20926681	0.0157903	1.01592	8	102218435	ZNF706;ZNF706;ZNF706;ZNF706	TSS1500;TSS1500;TSS1500;TSS200	Island	8.04855e-06
cg20935945	0.0259326	1.02627	17	72969046	C17orf28	TSS200	Island	2.17853e-05
cg21033855	0.0420845	1.04298	15	43662581	TUBGCP4;ZSCAN29	TSS1500;TSS1500	N_Shore	9.05929e-10
cg21053365	0.0216695	1.02191	7	148822721	ZNF425;ZNF398	Body;TSS1500	N_Shore	1.98522e-05
cg21072629	0.0396091	1.0404	21	33765622	URB1;C21orf119	TSS1500;Body	Island	3.0819e-06
cg21073178	0.0413037	1.04217	8	75861793	NA	NA	NA	3.78784e-05
cg21083089	-0.0253776	0.974942	6	31860201	EHMT2;EHMT2	Body;Body	S_Shelf	7.80027e-08
cg21113318	-0.0218061	0.97843	14	92983645	RIN3	Body	S_Shelf	5.17238e-05
cg21144158	-0.0252459	0.97507	11	65211084	MIR612	TSS1500	NA	1.2689e-07
cg21153313	-0.0275957	0.972782	15	74695316	NA	NA	NA	1.32892e-05
cg21163429	-0.0320008	0.968506	10	44788812	NA	NA	Island	5.88562e-05
cg21166047	-0.0357037	0.964926	9	7478187	NA	NA	NA	4.90227e-05
cg21168835	-0.0621156	0.939774	10	130713007	NA	NA	NA	9.29103e-09
cg21176597	-0.0471047	0.953988	14	101526870	MIR496	TSS200	NA	6.36342e-06
cg21209364	0.0340732	1.03466	9	99616394	ZNF782	TSS200	N_Shore	4.02638e-07
cg21216173	-0.0515479	0.949758	10	2208176	NA	NA	NA	1.27613e-05
cg21252248	0.0228628	1.02313	7	79765032	GNAI1;GNAI1	TSS200;Body	S_Shore	1.72698e-06
cg21255942	-0.0768944	0.925988	22	39954186	NA	NA	Island	4.88262e-05
cg21257831	-0.0239279	0.976356	12	49168469	ADCY6;ADCY6	ExonBnd;Body	NA	1.14703e-05
cg21262872	-0.0474111	0.953695	7	16438084	ISPD;ISPD	Body;Body	NA	1.14772e-05
cg21268144	0.0492255	1.05046	12	34531722	NA	NA	NA	1.61019e-06
cg21370986	0.0273814	1.02776	7	6145114	USP42	5'UTR	Island	2.06469e-06
cg21372595	-0.0863464	0.917276	12	14136152	NA	NA	S_Shore	8.52259e-06
cg21417130	-0.0243428	0.975951	1	19400922	NA	NA	NA	1.86502e-05
cg21450723	0.0292241	1.02966	22	46482009	LOC400931	Body	Island	3.10407e-05
cg21511321	-0.0224175	0.977832	7	1004997	COX19	3'UTR	N_Shelf	1.90012e-05
cg21545977	0.0398491	1.04065	1	11741439	MAD2L2;MAD2L2	5'UTR;TSS200	Island	8.67788e-09
cg21553977	-0.0265842	0.973766	6	26389754	BTN2A2;BTN2A2;BTN2A2;BTN2A2;BTN2A2;BTN2A2	Body;Body;Body;Body;Body;Body	NA	1.02716e-06
cg21556191	0.0327027	1.03324	8	12613561	LONRF1	TSS1500	Island	7.10005e-06
cg21567404	-0.0430188	0.957893	3	27674614	NA	NA	Island	2.88465e-06
cg21571784	0.0236624	1.02394	1	159683629	CRP	Body	NA	1.86815e-05
cg21574811	-0.0376391	0.96306	11	111798874	DIXDC1	5'UTR	S_Shore	2.07949e-06
cg21575197	-0.0299071	0.970536	2	201809306	ORC2;ORC2	Body;Body	NA	2.88552e-06
cg21582582	-0.0204538	0.979754	3	182698605	DCUN1D1	TSS1500	Island	4.78748e-05
cg21592954	-0.021268	0.978957	11	126304039	KIRREL3;KIRREL3	Body;Body	NA	5.2605e-05
cg21652771	-0.0154466	0.984672	9	92095410	SEMA4D;SEMA4D	TSS1500;TSS1500	NA	5.81944e-06
cg21666903	-0.0250323	0.975278	15	59808969	FAM81A	Body	NA	5.27115e-05
cg21679970	-0.048854	0.95232	2	10581770	ODC1	Body	NA	1.02284e-05
cg21834248	0.034216	1.03481	1	222763810	TAF1A;TAF1A	TSS1500;TSS1500	S_Shore	3.24181e-05
cg21854921	0.0392218	1.04	8	23540536	NKX3-1;NKX3-1;NKX3-1	TSS200;TSS200;TSS200	Island	2.27715e-06
cg21856508	0.0689048	1.07133	8	75620389	MIR2052HG	Body	NA	1.26822e-05
cg21899500	0.0189183	1.0191	3	51740850	GRM2;GRM2	TSS1500;TSS1500	Island	3.0047e-05
cg21946374	-0.0286718	0.971735	5	1108401	SLC12A7	Body	N_Shore	4.23099e-08
cg21947762	-0.0206024	0.979608	9	92284173	UNQ6494	Body	NA	4.97545e-05
cg21971539	-0.0270855	0.973278	14	39734390	CTAGE5;CTAGE5;CTAGE5	TSS1500;TSS1500;TSS200	N_Shore	7.65422e-06
cg22028894	-0.0637077	0.938279	5	140719360	PCDHGA2;PCDHGA2;PCDHGA1	1stExon;1stExon;Body	S_Shore	2.52644e-06
cg22056480	-0.044116	0.956843	12	20704804	PDE3A	Body	Island	2.07327e-07
cg22080282	0.0338553	1.03443	18	72920932	ZADH2	1stExon	Island	5.74062e-06
cg22091132	0.0323381	1.03287	18	56807218	SEC11C	1stExon	Island	2.5613e-05
cg22097600	-0.0256033	0.974722	11	126256655	ST3GAL4;ST3GAL4	5'UTR;5'UTR	NA	4.67284e-06
cg22105782	-0.0214667	0.978762	12	115357080	NA	NA	NA	2.32908e-05
cg22144162	-0.0228302	0.977428	16	16458764	NA	NA	Island	4.84267e-05
cg22144875	-0.0246419	0.975659	19	46032431	OPA3	Body	Island	3.06844e-05
cg22154364	-0.0938527	0.910417	13	108369162	FAM155A	Body	NA	5.57593e-05
cg22161674	-0.0320534	0.968455	2	235073160	NA	NA	NA	8.83357e-06
cg22199908	-0.0198365	0.980359	4	160066771	NA	NA	NA	4.79167e-05
cg22219933	0.0180569	1.01822	17	79911726	NOTUM	Body	N_Shore	3.34484e-05
cg22228754	-0.0219215	0.978317	7	73534658	LIMK1	Body	NA	3.92876e-05
cg22230395	0.0411408	1.042	5	153418202	FAM114A2;MFAP3;MFAP3;MFAP3	5'UTR;TSS1500;TSS1500;TSS1500	Island	9.40888e-07
cg22252938	-0.0838748	0.919546	4	46725938	NA	NA	NA	4.59792e-05
cg22278056	-0.0313918	0.969096	19	44439434	NA	NA	Island	3.70025e-05
cg22294431	-0.0319401	0.968565	2	127395778	NA	NA	NA	1.54345e-05
cg22408308	0.0275261	1.02791	2	172544235	DYNC1I2;DYNC1I2;DYNC1I2;DYNC1I2;DYNC1I2;DYNC1I2;DYNC1I2;DYNC1I2;DYNC1I2;DYNC1I2	5'UTR;5'UTR;5'UTR;5'UTR;1stExon;1stExon;1stExon;5'UTR;5'UTR;5'UTR	Island	1.03391e-05
cg22482142	-0.0027214	0.997282	6	9811285	NA	NA	NA	4.9218e-05
cg22491225	0.061817	1.06377	15	41136499	SPINT1;SPINT1;SPINT1	TSS200;5'UTR;5'UTR	Island	1.48322e-08
cg22516385	-0.042448	0.95844	1	114081079	MAGI3;MAGI3	Body;Body	NA	2.27261e-05
cg22599707	-0.0154482	0.984671	5	150594306	CCDC69	Body	NA	1.39246e-07
cg22682646	-0.0528566	0.948516	12	114216448	NA	NA	NA	7.52573e-06
cg22720029	0.0274362	1.02782	22	32058579	NA	NA	S_Shore	5.74192e-05
cg22773231	-0.0296948	0.970742	7	41050111	NA	NA	NA	3.81103e-05
cg22898156	-0.0656685	0.936441	20	17868757	NA	NA	NA	1.03314e-07
cg22899392	-0.0566251	0.944948	5	1952941	NA	NA	S_Shelf	1.73226e-06
cg22913259	-0.0282834	0.972113	1	180137456	QSOX1;QSOX1	Body;Body	NA	4.60772e-05
cg22942576	-0.0239215	0.976362	1	201476775	CSRP1;CSRP1	TSS1500;TSS1500	S_Shore	4.84633e-05
cg22951727	0.0569374	1.05859	7	127292125	SND1	TSS200	Island	6.00214e-05
cg22964471	-0.0220493	0.978192	2	27358529	PREB	TSS1500	S_Shore	5.14051e-05
cg22968887	-0.0355822	0.965043	2	222506138	NA	NA	NA	3.3645e-05
cg22978831	-0.0693357	0.933013	15	25320913	SNORD116-12;SNORD116-11	TSS1500;TSS200	NA	8.05784e-08
cg23010414	0.0602185	1.06207	17	33569972	SLFN5	TSS200	Island	4.34448e-06
cg23050300	-0.037104	0.963576	1	3281321	PRDM16;PRDM16	Body;Body	NA	1.37865e-05
cg23070485	-0.0264103	0.973935	19	55083368	LILRA2;LILRA2	TSS1500;TSS1500	NA	1.78937e-05
cg23105185	0.0593523	1.06115	3	49395800	GPX1;GPX1	TSS200;TSS200	Island	4.79173e-05
cg23153556	-0.0274313	0.972941	11	64900163	SYVN1;SYVN1	Body;Body	N_Shore	2.85511e-05
cg23190203	0.0351844	1.03581	10	102791082	PDZD7;SFXN3;SFXN3	TSS1500;5'UTR;1stExon	N_Shore	3.47497e-06
cg23192346	-0.0367494	0.963918	6	168197699	C6orf123	TSS200	Island	4.15795e-05
cg23219808	-0.0177731	0.982384	6	166797419	BRP44L	TSS1500	S_Shore	4.88439e-05
cg23246984	-0.0306843	0.969782	3	52512090	NISCH;NISCH;NISCH	Body;Body;Body	NA	4.60062e-07
cg23313200	-0.0319858	0.96852	9	130180527	NA	NA	NA	1.87902e-05
cg23330998	-0.0234719	0.976801	1	157061233	NA	NA	NA	2.4725e-05
cg23350754	-0.0161706	0.983959	10	134978012	KNDC1	Body	Island	3.55953e-05
cg23403783	-0.0707689	0.931677	8	23273831	NA	NA	NA	1.56493e-06
cg23404711	-0.0297293	0.970708	14	75747047	FOS	Body	S_Shore	4.16129e-05
cg23454289	-0.0212226	0.979001	7	101843143	CUX1;CUX1;CUX1	Body;Body;Body	S_Shelf	4.34545e-05
cg23519155	-0.0221886	0.978056	2	37815128	NA	NA	NA	9.20571e-07
cg23621127	0.0488647	1.05008	5	127873778	FBN2	TSS200	Island	3.07243e-06
cg23658326	0.0517704	1.05313	3	37034787	EPM2AIP1;MLH1;MLH1;MLH1;MLH1;EPM2AIP1	5'UTR;TSS1500;TSS1500;TSS1500;TSS200;1stExon	Island	3.18356e-07
cg23667984	-0.0339775	0.966593	19	43528994	PSG11;PSG11;PSG11	Body;Body;Body	NA	5.13227e-06
cg23721596	-0.0581591	0.9435	10	17418342	ST8SIA6	Body	NA	2.41699e-05
cg23726566	0.0233465	1.02362	6	7051754	NA	NA	Island	4.16264e-06
cg23763137	-0.0326678	0.96786	22	24823509	ADORA2A	TSS200	S_Shelf	6.38044e-06
cg23787873	-0.0447397	0.956246	22	19710909	GP1BB;SEPT5	TSS200;3'UTR	Island	6.05612e-05
cg23808061	0.0242678	1.02456	1	179923593	CEP350	TSS1500	N_Shore	1.70606e-05
cg23866550	-0.0305643	0.969898	5	1894311	CTD-2194D22.4	Body	NA	4.70669e-05
cg23875821	0.0564288	1.05805	14	96969303	PAPOLA	Body	Island	1.01247e-05
cg23953395	-0.0184881	0.981682	11	116658773	ZNF259	TSS200	Island	2.94642e-05
cg24009328	-0.0234843	0.976789	11	73737057	C2CD3	Body	NA	4.39329e-06
cg24009529	0.042298	1.04321	6	32122470	PPT2;PPT2	Body;Body	Island	7.32145e-07
cg24017912	0.0385483	1.0393	6	17393521	CAP2	TSS1500	NA	2.32336e-07
cg24028120	0.0605959	1.06247	19	33463094	C19orf40;CCDC123	TSS200;TSS1500	Island	5.74696e-05
cg24031505	-0.0188515	0.981325	6	4779396	CDYL;CDYL	Body;Body	S_Shore	1.80062e-06
cg24047400	0.0323345	1.03286	1	117452415	PTGFRN	TSS1500	Island	2.031e-06
cg24071870	0.0255576	1.02589	2	232646207	PDE6D;PDE6D;PDE6D;COPS7B;COPS7B	TSS200;TSS200;TSS200;TSS200;TSS200	Island	1.46488e-06
cg24157349	-0.0439251	0.957026	22	47081751	CERK	3'UTR	Island	3.75788e-07
cg24234088	0.0451715	1.04621	3	132440446	NPHP3-AS1;NPHP3;NPHP3-ACAD11	TSS1500;Body;Body	N_Shore	9.45801e-09
cg24237813	-0.0148726	0.985237	20	50385486	ATP9A	TSS1500	S_Shore	1.62839e-07
cg24251339	0.023687	1.02397	6	136571565	FAM54A;FAM54A	TSS200;TSS200	Island	1.57503e-06
cg24252818	-0.0206515	0.97956	12	93415112	LOC643339	Body	NA	5.39241e-05
cg24261270	0.030252	1.03071	8	22462105	KIAA1967;KIAA1967	TSS200;TSS1500	Island	2.10367e-05
cg24349665	0.0804541	1.08378	8	75736723	PI15	TSS200	NA	1.26722e-06
cg24358110	0.0507031	1.05201	7	8009540	LOC100505921;GLCCI1	TSS1500;Body	S_Shore	6.91676e-06
cg24372565	0.0250836	1.0254	18	71815078	FBXO15;FBXO15;C18orf55;FBXO15	TSS200;1stExon;TSS1500;5'UTR	Island	1.65775e-05
cg24412797	0.0341421	1.03473	17	8191814	RANGRF;SLC25A35	TSS200;3'UTR	N_Shore	1.20045e-06
cg24426483	-0.020095	0.980106	2	20738271	NA	NA	NA	2.02271e-05
cg24452366	0.0276495	1.02804	12	42719850	PPHLN1;PPHLN1;PPHLN1;PPHLN1;PPHLN1;ZCRB1;PPHLN1;PPHLN1;ZCRB1;PPHLN1	TSS200;TSS200;TSS200;TSS200;TSS200;5'UTR;TSS200;TSS200;1stExon;TSS200	Island	8.5169e-06
cg24482053	0.0278267	1.02822	14	75518003	MLH3;MLH3	5'UTR;5'UTR	Island	9.46625e-06
cg24591034	-0.0157901	0.984334	1	236188140	NID1	Body	NA	6.85303e-06
cg24606371	-0.0229963	0.977266	15	32728271	ULK4P3;ULK4P2;ULK4P1	TSS1500;TSS1500;TSS1500	S_Shore	1.65391e-07
cg24615340	-0.0300486	0.970398	17	73691992	SAP30BP;SAP30BP;SAP30BP;SAP30BP;SAP30BP	Body;Body;Body;Body;Body	NA	9.4263e-06
cg24640641	0.0355551	1.03619	6	31939768	DOM3Z;STK19;STK19;DOM3Z;STK19;STK19;STK19	5'UTR;5'UTR;1stExon;1stExon;1stExon;Body;5'UTR	Island	4.9371e-07
cg24682149	0.0228275	1.02309	17	42143817	LSM12	Body	Island	8.76959e-06
cg24720442	0.0362326	1.0369	19	56154855	ZNF581	TSS200	Island	5.0763e-05
cg24751836	0.0531894	1.05463	15	91475873	UNC45A;HDDC3	5'UTR;TSS200	Island	5.10984e-05
cg24788636	0.0267491	1.02711	1	40562667	PPT1;PPT1	Body;Body	Island	1.78356e-05
cg24811290	0.0517591	1.05312	4	159092553	FAM198B;FAM198B;FAM198B	5'UTR;5'UTR;5'UTR	NA	6.08e-07
cg24817154	0.0223811	1.02263	6	27858279	HIST1H3J	1stExon	Island	2.68679e-06
cg24872570	0.0339777	1.03456	6	108396168	OSTM1	TSS1500	Island	1.862e-06
cg24891434	-0.0358919	0.964745	11	69934031	ANO1;ANO1	Body;Body	Island	2.77985e-05
cg24962545	-0.0187189	0.981455	3	50606606	HEMK1;C3orf18	TSS1500;TSS1500	Island	1.95729e-05
cg25001335	-0.0230718	0.977192	15	41185399	VPS18	TSS1500	N_Shore	5.32372e-05
cg25008147	-0.0790753	0.92397	8	40755864	ZMAT4;ZMAT4	TSS1500;TSS1500	S_Shore	4.38529e-05
cg25016190	-0.0207109	0.979502	1	88108838	NA	NA	NA	6.08645e-05
cg25022584	-0.0231625	0.977104	9	140965943	CACNA1B;CACNA1B	Body;Body	NA	3.16676e-05
cg25059899	-0.0770925	0.925804	18	60904328	BCL2	Body	NA	5.11164e-05
cg25060468	0.0469244	1.04804	17	7155389	C17orf81;DULLARD;C17orf81;C17orf81;C17orf81;C17orf81;DULLARD	TSS200;TSS200;TSS200;TSS200;1stExon;5'UTR;TSS1500	Island	1.67781e-06
cg25102614	-0.0676537	0.934584	12	40602692	NA	NA	NA	2.32363e-05
cg25196296	-0.0204749	0.979733	8	12236164	FAM66A	Body	NA	1.14102e-05
cg25236267	0.0233214	1.0236	1	43232832	C1orf50;C1orf50;P3H1;P3H1;P3H1	TSS200;TSS200;TSS200;TSS200;TSS200	Island	3.31884e-05
cg25310490	-0.0176666	0.982489	1	236109875	NA	NA	NA	4.87283e-06
cg25362542	-0.0257549	0.974574	19	9434924	ZNF559	TSS200	Island	3.08016e-05
cg25407198	-0.0135946	0.986497	7	130131268	MEST;MEST;MEST;MESTIT1;MEST	TSS1500;5'UTR;5'UTR;TSS1500;1stExon	Island	4.33713e-05
cg25434113	-0.0252914	0.975026	13	24882236	C1QTNF9;C1QTNF9;C1QTNF9	TSS1500;TSS1500;5'UTR	Island	2.13326e-08
cg25459170	-0.0545041	0.946955	22	37889619	CARD10	Body	NA	2.75288e-05
cg25463483	-0.0197311	0.980462	6	30530544	PRR3;PRR3	3'UTR;3'UTR	NA	5.89812e-05
cg25469698	0.0326101	1.03315	2	99953674	TXNDC9;EIF5B	TSS1500;TSS200	Island	1.38002e-06
cg25511621	0.028696	1.02911	6	53883681	C6orf142	TSS200	NA	1.98469e-05
cg25658983	-0.0566062	0.944966	13	46426026	SIAH3	TSS200	NA	5.16261e-05
cg25667171	-0.0129068	0.987176	19	15236697	ILVBL	TSS200	S_Shore	6.11332e-05
cg25674613	0.0779129	1.08103	8	1273808	NA	NA	NA	8.6757e-08
cg25714766	-0.0131968	0.98689	16	2957177	NA	NA	S_Shore	9.69006e-06
cg25753555	0.0412471	1.04211	18	67955882	SOCS6	TSS1500	Island	6.88624e-09
cg25794694	-0.0164223	0.983712	17	59668517	NACA2	1stExon	NA	6.30623e-06
cg25806524	-0.0266862	0.973667	19	46998786	PNMAL2;PNMAL2;PPP5D1	1stExon;5'UTR;Body	S_Shore	1.25984e-06
cg25875163	-0.0252891	0.975028	8	143763340	PSCA	Body	NA	1.09432e-05
cg25882709	0.0302629	1.03073	1	224517832	NVL;NVL;NVL;NVL	1stExon;5'UTR;5'UTR;1stExon	Island	1.52213e-05
cg25883022	-0.0119094	0.988161	13	103527016	BIVM-ERCC5;ERCC5	Body;Body	NA	2.67057e-09
cg25917747	-0.0292618	0.971162	17	21561886	NA	NA	NA	2.86088e-06
cg25919098	-0.0284069	0.971993	7	1857272	MAD1L1;MAD1L1;MAD1L1	Body;Body;Body	NA	1.81374e-05
cg25929382	-0.0373337	0.963355	17	54228062	NA	NA	NA	3.8445e-05
cg25945499	-0.0240359	0.976251	8	144554079	ZC3H3	Body	S_Shore	4.08594e-05
cg26027366	-0.0281566	0.972236	17	42486913	GPATCH8;GPATCH8;GPATCH8;GPATCH8;GPATCH8;GPATCH8	Body;Body;Body;Body;Body;Body	NA	4.14032e-06
cg26033657	-0.0193677	0.980819	17	66507816	PRKAR1A;PRKAR1A;PRKAR1A	TSS1500;TSS1500;TSS1500	Island	7.44404e-06
cg26067250	0.0375239	1.03824	2	172950449	DLX1;DLX1	1stExon;1stExon	N_Shore	2.78347e-06
cg26125811	0.0375331	1.03825	3	152552562	P2RY1	TSS200	N_Shore	2.32606e-05
cg26129916	0.0357905	1.03644	17	73258208	GGA3;MRPS7;GGA3	TSS1500;Body;TSS1500	S_Shore	4.95818e-05
cg26173946	-0.0306703	0.969795	7	48126643	NA	NA	N_Shore	5.38051e-05
cg26188191	-0.0172005	0.982947	16	81570427	CMIP;CMIP	Body;Body	NA	2.1958e-05
cg26228569	0.0477735	1.04893	9	134955334	MED27	TSS200	Island	1.68481e-06
cg26283008	-0.0158923	0.984233	15	45507820	NA	NA	NA	4.41654e-05
cg26308595	-0.0253534	0.974965	2	175482415	WIPF1;WIPF1	5'UTR;5'UTR	NA	3.70235e-05
cg26332285	-0.027738	0.972643	10	134915746	GPR123	Body	S_Shore	5.61388e-05
cg26404919	-0.0324136	0.968106	19	11108567	SMARCA4;SMARCA4;SMARCA4;SMARCA4;SMARCA4;SMARCA4;SMARCA4	Body;Body;Body;Body;Body;Body;Body	NA	5.95472e-07
cg26432459	-0.023306	0.976964	5	172279819	ERGIC1	Body	NA	7.20771e-06
cg26444741	-0.0235317	0.976743	7	102921054	DPY19L2P2;DPY19L2P2	TSS1500;TSS200	Island	2.93635e-05
cg26468124	-0.0252982	0.975019	17	29284873	ADAP2	Body	NA	4.16037e-05
cg26600181	0.0475826	1.04873	4	7105115	FLJ36777	TSS200	NA	4.16848e-05
cg26627327	-0.0281776	0.972216	2	240131751	HDAC4	Body	NA	3.46125e-05
cg26673647	0.0241845	1.02448	16	2059038	ZNF598	Body	N_Shore	1.06147e-05
cg26752796	-0.0394949	0.961275	12	299707	SLC6A12;SLC6A12;SLC6A12;SLC6A12	3'UTR;3'UTR;3'UTR;3'UTR	S_Shore	7.5312e-06
cg26776551	-0.0269941	0.973367	13	51944507	INTS6;INTS6	Body;Body	NA	5.51945e-07
cg26794830	-0.0337916	0.966773	19	3193804	NCLN	Body	S_Shore	4.38001e-06
cg26841425	-0.0372934	0.963393	10	45958771	MARCH8;MARCH8;MARCH8	Body;Body;Body	NA	1.58589e-06
cg26864012	-0.0255191	0.974804	16	30776321	RNF40	Body	S_Shelf	1.01712e-05
cg26873413	-0.0154176	0.984701	19	56728589	NA	NA	Island	5.74334e-07
cg26950947	-0.0324797	0.968042	11	120068986	NA	NA	NA	1.41563e-05
cg26956799	0.0249024	1.02522	19	584425	NA	NA	N_Shore	3.12316e-05
cg26994023	0.0251926	1.02551	5	153418932	MFAP3;FAM114A2;MFAP3;MFAP3	5'UTR;TSS1500;5'UTR;Body	S_Shore	5.26217e-05
cg26996244	-0.0393149	0.961448	7	131593640	LOC101928782	TSS1500	NA	4.15219e-05
cg27002179	-0.0835735	0.919823	14	88313569	NA	NA	NA	1.71528e-07
cg27003832	-0.046103	0.954944	6	15441513	JARID2;JARID2	Body;5'UTR	NA	7.17927e-06
cg27045481	-0.0589859	0.94272	6	151565318	AKAP12	Body	S_Shelf	1.89972e-07
cg27099293	-0.0233963	0.976875	10	71895572	NA	NA	S_Shelf	5.21219e-05
cg27106448	-0.0418025	0.959059	22	42869970	NA	NA	NA	5.61663e-05
cg27117179	-0.010585	0.989471	3	75410789	NA	NA	NA	1.26112e-05
cg27139457	-0.0255912	0.974734	2	85637739	CAPG	TSS200	N_Shelf	2.82509e-06
cg27154343	-0.0158039	0.98432	12	75603480	KCNC2;KCNC2;KCNC2;KCNC2;KCNC2;KCNC2	1stExon;1stExon;5'UTR;5'UTR;1stExon;5'UTR	S_Shore	5.79222e-05
cg27154510	-0.0264461	0.973901	17	18146917	LLGL1	3'UTR	N_Shelf	2.55756e-05
cg27195137	0.0392358	1.04002	16	66921283	PDP2	3'UTR	NA	3.93318e-05
cg27211204	0.0520052	1.05338	15	99791508	LRRC28	TSS200	Island	3.96248e-05
cg27228563	0.0413009	1.04217	15	74284600	STOML1;STOML1	1stExon;5'UTR	Island	2.14936e-05
cg27249990	-0.0227151	0.977541	17	61787919	STRADA;STRADA;STRADA;STRADA;STRADA;STRADA	Body;Body;Body;Body;Body;Body	NA	5.21827e-05
cg27257205	-0.0208544	0.979362	22	35806330	MCM5	Body	NA	1.54173e-05
cg27259807	-0.0247313	0.975572	18	8721740	MTCL1	Body	NA	4.41991e-05
cg27263651	0.0192279	1.01941	15	64455595	PPIB	TSS1500	S_Shore	1.09528e-05
cg27264894	-0.0509769	0.950301	1	228466616	OBSCN;OBSCN	Body;Body	N_Shore	4.07983e-07
cg27298425	-0.0264223	0.973924	15	79216880	CTSH	Body	NA	1.50361e-05
cg27301475	-0.0314656	0.969024	1	1472146	C1orf70	Body	N_Shore	1.51402e-07
cg27302539	-0.0279274	0.972459	14	54413548	NA	NA	Island	4.24005e-05
cg27348777	0.046276	1.04736	14	58666767	ACTR10	TSS200	Island	4.04265e-05
cg27366775	-0.0368816	0.96379	16	3596858	NLRC3	Body	NA	1.75001e-07
cg27388587	-0.0321155	0.968395	2	97763993	NA	NA	S_Shelf	5.37498e-05
cg27422721	-0.00298551	0.997019	2	156822700	NA	NA	NA	2.30342e-06
cg27438935	0.0405944	1.04143	11	75110582	SNORD15A;RPS3;RPS3;RPS3;RPS3;RPS3;RPS3;RPS3;RPS3	TSS1500;5'UTR;5'UTR;5'UTR;1stExon;1stExon;1stExon;1stExon;5'UTR	Island	1.68847e-05
cg27440594	0.034969	1.03559	7	141401691	KIAA1147	1stExon	Island	1.22476e-06
cg27476398	-0.0252799	0.975037	9	133577625	EXOSC2;EXOSC2;EXOSC2;EXOSC2	Body;Body;Body;Body	NA	1.26274e-05
cg27659974	-0.0412666	0.959573	2	172430816	NA	NA	NA	3.93442e-07

## Sheet: Umbilical Cord
IlmnID	Estimate	OR	Chromosome	Position	Gene	Relation to Gene	Relation to CpG Island	Adjusted p-value
cg00003555	-0.0147927	0.985316	7	142985452	CASP2;CASP2;CASP2;CASP2;CASP2	TSS1500;5'UTR;5'UTR;1stExon;1stExon	Island	3.42848e-06
cg00114724	0.0227905	1.02305	2	264341	ACP1;ACP1;ACP1;ACP1;SH3YL1;SH3YL1;SH3YL1;SH3YL1;SH3YL1;SH3YL1	TSS1500;TSS1500;TSS1500;TSS1500;TSS1500;TSS1500;Body;Body;Body;5'UTR	Island	1.06826e-05
cg00118468	-0.0173485	0.982801	1	205196936	TMCC2	TSS200	Island	3.65329e-06
cg00140479	-0.0176879	0.982468	22	21356515	FLJ39582;FLJ39582;THAP7;THAP7	Body;Body;TSS200;TSS200	Island	1.09407e-05
cg00281842	-0.0244079	0.975888	5	140855562	PCDHGA4;PCDHGA12;PCDHGA11;PCDHGA11;PCDHGA9;PCDHGA1;PCDHGB1;PCDHGC3;PCDHGB6;PCDHGB3;PCDHGB7;PCDHGC3;PCDHGA6;PCDHGA8;PCDHGA10;PCDHGA5;PCDHGB4;PCDHGA3;PCDHGC3;PCDHGA2;PCDHGA7;PCDHGB2;PCDHGB5	Body;Body;Body;Body;Body;Body;Body;TSS200;Body;Body;Body;TSS200;Body;Body;Body;Body;Body;Body;TSS200;Body;Body;Body;Body	Island	8.80544e-06
cg00285829	-0.0175258	0.982627	11	82904897	ANKRD42;ANKRD42;ANKRD42;ANKRD42;ANKRD42;ANKRD42;ANKRD42;ANKRD42;ANKRD42;ANKRD42;ANKRD42;ANKRD42;ANKRD42	5'UTR;5'UTR;5'UTR;5'UTR;5'UTR;5'UTR;1stExon;1stExon;1stExon;1stExon;1stExon;1stExon;Body	Island	5.58831e-06
cg00523812	-0.024583	0.975717	7	130081019	TSGA14	TSS200	Island	1.01154e-06
cg00673359	0.0270509	1.02742	3	131748172	CPNE4;CPNE4;CPNE4	Body;Body;5'UTR	NA	7.51134e-06
cg00772020	-0.0425285	0.958363	7	100808104	VGF	Body	Island	9.60885e-06
cg00853849	0.0293911	1.02983	1	231473975	SPRTN;SPRTN;SPRTN;SPRTN;SPRTN;SPRTN;EXOC8	5'UTR;5'UTR;5'UTR;1stExon;1stExon;1stExon;TSS1500	Island	2.49243e-06
cg00919994	-0.0181033	0.98206	13	50018380	CAB39L;SETDB2	TSS200;TSS200	Island	1.1108e-05
cg01050704	-0.0242431	0.976048	19	59084995	MZF1;MZF1;LOC100131691	TSS200;TSS200;Body	Island	1.16297e-05
cg01162436	0.0540875	1.05558	10	15902292	FAM188A	1stExon	Island	1.05032e-05
cg01188578	0.178849	1.19584	2	26464058	HADHA	Body	N_Shelf	2.15739e-06
cg01329093	-0.0362868	0.964364	19	9546029	ZNF266;ZNF266;ZNF266;ZNF266	1stExon;5'UTR;5'UTR;1stExon	Island	2.92228e-06
cg01361954	-0.0221241	0.978119	1	201476456	CSRP1;CSRP1;CSRP1	TSS1500;TSS200;TSS200	Island	1.3258e-07
cg01419757	-0.0255726	0.974752	11	101918171	C11orf70	TSS200	Island	3.35673e-06
cg01507044	-0.0331083	0.967434	13	23949294	SACS	Body	Island	8.64269e-06
cg01515802	0.0418225	1.04271	19	54876749	LAIR1;LAIR1	TSS200;TSS200	NA	9.5152e-06
cg01608167	-0.0173765	0.982774	12	16035282	STRAP	TSS200	Island	1.00527e-05
cg01670677	-0.0197136	0.980479	11	71955322	PHOX2A	TSS200	Island	1.06225e-05
cg01755729	-0.0314834	0.969007	8	146012904	ZNF34	TSS200	Island	3.22384e-08
cg01791890	-0.0203683	0.979838	4	26862182	STIM2;STIM2;STIM2	TSS200;TSS200;TSS200	Island	4.21341e-06
cg01999479	-0.024887	0.97542	11	126081473	RPUSD4;RPUSD4;FAM118B	1stExon;1stExon;TSS200	Island	9.12364e-07
cg02036641	-0.0206747	0.979538	2	98206320	ANKRD36B;ANKRD36B	1stExon;5'UTR	Island	2.0467e-07
cg02060794	-0.0210502	0.97917	3	52273307	TWF2	TSS200	Island	1.04863e-05
cg02169333	0.0225616	1.02282	16	57023494	NLRC5;NLRC5	5'UTR;1stExon	Island	1.40127e-05
cg02308366	-0.0343921	0.966193	7	138145031	TRIM24;TRIM24	TSS200;TSS200	Island	1.03759e-06
cg02396888	-0.0244587	0.975838	1	31191746	MATN1	Body	Island	2.34523e-07
cg02436788	-0.0187208	0.981453	17	15245089	TEKT3	TSS200	Island	6.2845e-08
cg02660350	-0.0226007	0.977653	10	99186001	PGAM1	TSS200	Island	6.39021e-08
cg02677352	-0.0201821	0.98002	4	48833292	OCIAD1;OCIAD1;OCIAD1;OCIAD1;OCIAD1;OCIAD1;OCIAD1;OCIAD1	TSS200;5'UTR;5'UTR;5'UTR;1stExon;5'UTR;1stExon;5'UTR	Island	6.5139e-06
cg02744699	0.0186534	1.01883	17	80197898	NA	NA	N_Shelf	9.71698e-07
cg02759110	-0.021682	0.978551	4	141489859	UCP1	1stExon	N_Shore	1.96214e-05
cg02792140	-0.0197699	0.980424	19	3505953	FZR1	TSS1500	Island	2.66368e-06
cg03039387	-0.0505665	0.950691	6	31364895	NA	NA	N_Shelf	7.00099e-06
cg03041989	-0.0492951	0.9519	16	30022548	DOC2A	TSS200	N_Shore	5.92609e-06
cg03122372	-0.0154812	0.984638	12	56651912	ANKRD52	Body	Island	2.03784e-05
cg03309347	-0.0251284	0.975185	19	1238234	C19orf26	TSS1500	Island	3.23807e-07
cg03401357	-0.0206862	0.979526	1	46951477	NA	NA	Island	3.54882e-06
cg03403265	-0.0195194	0.98067	16	2581833	CEMP1	TSS1500	Island	9.02872e-06
cg03456872	-0.0167781	0.983362	22	29279967	ZNRF3;ZNRF3	5'UTR;1stExon	Island	3.68121e-06
cg03466432	-0.0209956	0.979223	15	34630330	SLC12A6;SLC12A6;SLC12A6;SLC12A6;SLC12A6	TSS200;TSS1500;TSS1500;TSS1500;TSS1500	Island	1.79132e-05
cg03570498	0.0237326	1.02402	10	131566727	NA	NA	NA	5.10595e-06
cg03612462	-0.0212337	0.97899	10	77160563	ZNF503;ZNF503-AS2;ZNF503	Body;TSS1500;Body	Island	1.20243e-05
cg03616164	-0.0212682	0.978956	20	3748536	C20orf27	TSS200	Island	1.14282e-05
cg03670164	-0.0197684	0.980426	3	178789707	ZMAT3;ZMAT3	TSS200;TSS200	Island	1.16767e-05
cg03751055	-0.0840652	0.919371	10	131380455	MGMT	Body	NA	7.45539e-06
cg03753597	-0.0228032	0.977455	21	47706070	MCM3AP;C21orf57;C21orf57	TSS1500;TSS200;TSS200	Island	1.56718e-05
cg03834023	0.0151757	1.01529	2	27356128	PREB	Body	N_Shore	1.74889e-05
cg03876184	0.074104	1.07692	2	27886755	SUPT7L;SLC4A1AP	TSS1500;1stExon	Island	1.31076e-05
cg04081324	-0.0178217	0.982336	5	149829376	RPS14;RPS14;RPS14	TSS200;TSS200;TSS200	Island	1.73238e-05
cg04115680	-0.0263086	0.974034	7	75889229	SRRM3	Body	Island	4.88941e-06
cg04237662	-0.0172356	0.982912	11	117049512	SIDT2	TSS1500	Island	6.3412e-06
cg04304461	0.0456768	1.04674	13	20220437	MPHOSPH8	Body	NA	7.32597e-07
cg04330628	0.0620272	1.06399	15	44116879	MFAP1;MFAP1	1stExon;5'UTR	Island	1.60172e-05
cg04407470	-0.0210309	0.979189	6	108489977	NR2E1	Body	Island	3.22971e-07
cg04571522	-0.0133757	0.986713	1	4468089	NA	NA	NA	4.19326e-07
cg04590284	-0.0177685	0.982388	7	102105201	ALKBH4;LRWD1	1stExon;TSS200	Island	1.17486e-05
cg04714877	-0.0169995	0.983144	7	38217832	STARD3NL	TSS200	Island	8.99866e-06
cg04740665	0.0798963	1.08317	1	205560997	MFSD4	Body	N_Shore	8.3886e-06
cg04979509	0.0443799	1.04538	1	181809314	NA	NA	NA	6.60501e-08
cg05045528	0.0400287	1.04084	9	132815702	GPR107;GPR107;GPR107	TSS1500;TSS1500;TSS1500	N_Shore	1.18019e-06
cg05050358	-0.0200676	0.980132	20	25566183	NINL	TSS200	Island	2.04338e-07
cg05056979	-0.0403215	0.960481	16	2003817	RPL3L	Body	NA	9.92296e-06
cg05153820	-0.0181158	0.982047	5	149829439	RPS14;RPS14;RPS14	TSS200;TSS200;TSS200	Island	5.09246e-07
cg05154698	-0.0230007	0.977262	1	26202441	NA	NA	Island	2.14665e-06
cg05166316	-0.022397	0.977852	5	64920006	TRIM23;C5orf44;TRIM23;TRIM23;C5orf44;C5orf44;C5orf44	Body;TSS1500;Body;Body;TSS1500;TSS1500;TSS1500	Island	1.39888e-06
cg05242526	-0.0215326	0.978698	4	86396103	ARHGAP24	TSS200	NA	1.475e-05
cg05265233	-0.0205084	0.9797	22	42475505	SMDT1	TSS200	Island	1.35545e-07
cg05354521	-0.0195352	0.980654	17	79519227	C17orf70;C17orf70;C17orf70	1stExon;1stExon;5'UTR	Island	1.04054e-05
cg05359028	0.0284968	1.02891	3	38495016	LOC100128640;ACVR2B	Body;TSS1500	N_Shore	6.9658e-06
cg05415496	-0.0156811	0.984441	17	79519191	C17orf70;C17orf70;C17orf70	1stExon;1stExon;5'UTR	Island	1.32694e-05
cg05439814	-0.0251577	0.975156	16	24550834	RBBP6;RBBP6;RBBP6	TSS200;TSS200;TSS200	Island	1.35458e-05
cg05453358	-0.0550907	0.946399	8	47529280	NA	NA	Island	5.89742e-06
cg05603630	-0.0163236	0.983809	10	52751341	PRKG1	1stExon	Island	1.13525e-05
cg05783329	-0.0297322	0.970705	6	34360212	NUDT3;NUDT3	5'UTR;1stExon	Island	6.23046e-07
cg05857203	0.0329232	1.03347	15	77197931	NA	NA	S_Shore	2.63693e-06
cg06012574	0.0447849	1.0458	16	89557737	ANKRD11	TSS1500	Island	2.97074e-06
cg06021447	-0.0231615	0.977105	3	4345259	SETMAR;SETMAR	Body;TSS200	Island	1.11695e-07
cg06084907	-0.0187844	0.981391	16	3551038	CLUAP1;CLUAP1	5'UTR;1stExon	Island	1.35164e-08
cg06112779	-0.0360892	0.964554	12	54982626	PPP1R1A	TSS200	S_Shore	6.8032e-06
cg06206128	-0.0168687	0.983273	15	65477834	CLPX	TSS1500	Island	1.50257e-05
cg06235582	-0.0214331	0.978795	16	226668	HBA1	TSS200	Island	2.60638e-06
cg06320026	-0.0247571	0.975547	14	102606061	HSP90AA1;HSP90AA1;WDR20;WDR20;WDR20;WDR20;WDR20;WDR20;WDR20;WDR20;WDR20	1stExon;5'UTR;TSS200;TSS200;TSS200;TSS200;TSS200;TSS200;TSS200;TSS200;TSS200	Island	1.20414e-06
cg06545180	0.0215437	1.02178	20	34287065	ROMO1;NFS1	TSS200;Body	Island	2.37819e-06
cg06570027	-0.034447	0.96614	2	31361086	GALNT14;GALNT14;GALNT14;GALNT14;GALNT14	1stExon;1stExon;5'UTR;5'UTR;Body	Island	6.82919e-06
cg06576119	-0.0259338	0.9744	7	102073947	ORAI2;ORAI2	TSS200;TSS200	Island	9.72278e-07
cg06598204	0.0274889	1.02787	12	72057381	THAP2;ZFC3H1	TSS1500;1stExon	Island	1.01756e-06
cg06606122	-0.0159729	0.984154	16	2273715	E4F1	1stExon	Island	2.6432e-06
cg06784991	-0.0230283	0.977235	1	53308768	ZYG11A	Body	Island	5.3435e-06
cg06824980	-0.0211422	0.97908	3	187463507	BCL6	TSS200	S_Shore	1.0311e-06
cg06860352	-0.0171007	0.983045	19	14142585	IL27RA;IL27RA	5'UTR;1stExon	Island	1.18775e-05
cg06895316	-0.0194071	0.98078	14	105262269	AKT1;AKT1	TSS200;TSS200	S_Shore	1.29151e-05
cg06907295	-0.0249676	0.975342	4	151936669	LRBA;LRBA	TSS1500;TSS200	Island	9.03624e-06
cg07089990	-0.0235411	0.976734	2	55920932	PNPT1	1stExon	Island	4.2964e-07
cg07163401	-0.0163667	0.983766	2	72376239	CYP26B1	TSS1500	Island	1.25565e-06
cg07200850	-0.0179818	0.982179	16	74808755	FA2H	TSS200	Island	2.15226e-05
cg07251603	-0.0257505	0.974578	3	57994031	FLNB;FLNB;FLNB;FLNB	TSS200;TSS200;TSS200;TSS200	Island	1.95405e-09
cg07408690	-0.0206121	0.979599	9	74979555	ZFAND5;ZFAND5;ZFAND5;ZFAND5;ZFAND5;ZFAND5	5'UTR;5'UTR;5'UTR;TSS200;TSS200;TSS200	Island	5.82825e-06
cg07436418	-0.0255524	0.974771	16	67035158	CES8	Body	Island	1.78794e-05
cg07542475	-0.0161948	0.983936	3	44903330	MIR564;TMEM42	TSS200;TSS200	Island	1.69419e-05
cg07548383	0.0244426	1.02474	1	152284827	FLG	Body	NA	3.00572e-06
cg07655457	-0.0179568	0.982203	16	1728246	HN1L	TSS200	Island	8.30759e-06
cg07687739	-0.0214343	0.978794	17	31657944	ASIC2	Body	NA	2.84648e-08
cg07866179	-0.0165132	0.983622	16	23652650	PALB2;PALB2;DCTN5	1stExon;5'UTR;TSS200	Island	1.87122e-05
cg08049373	0.040017	1.04083	18	32956512	ZNF396	5'UTR	N_Shore	7.82581e-07
cg08250364	0.0115475	1.01161	19	56111852	FIZ1;ZNF524	TSS1500;5'UTR	Island	1.72594e-05
cg08455700	-0.0198368	0.980359	15	49170194	SHC4;EID1	Body;TSS200	Island	7.49797e-06
cg08461352	-0.033124	0.967419	8	58910391	FAM110B	5'UTR	S_Shelf	1.31951e-05
cg08475931	-0.0187126	0.981461	7	30634393	GARS;GARS	5'UTR;1stExon	Island	1.86888e-05
cg08483316	0.0117242	1.01179	6	165348000	NA	NA	NA	1.80663e-05
cg08701047	-0.0223634	0.977885	10	130085199	NA	NA	NA	1.00036e-06
cg08743107	-0.0182902	0.981876	9	91933643	SECISBP2;SECISBP2;SECISBP2;SECISBP2	5'UTR;TSS200;Body;Body	Island	1.51585e-05
cg09045647	-0.017601	0.982553	5	175626705	NA	NA	S_Shore	9.79889e-06
cg09056181	-0.02688	0.973478	10	26505503	GAD2;GAD2;GAD2;GAD2	5'UTR;1stExon;5'UTR;1stExon	Island	1.69106e-05
cg09103591	-0.0220571	0.978184	22	50699708	MAPK12	Body	Island	7.72908e-06
cg09171530	-0.0245947	0.975705	21	35987539	RCAN1;RCAN1	TSS1500;TSS200	Island	1.55261e-06
cg09250741	-0.0261755	0.974164	3	156893021	NA	NA	Island	1.33312e-05
cg09268566	-0.0225155	0.977736	7	66767246	PMS2L4;STAG3L4	Body;TSS1500	Island	1.02938e-05
cg09270067	0.0363573	1.03703	5	178487147	ZNF354C	TSS1500	Island	4.15397e-06
cg09413064	-0.0217755	0.97846	1	154531422	UBE2Q1	TSS1500	Island	5.00014e-06
cg09545452	-0.0196624	0.98053	2	172779111	HAT1;HAT1	Body;Body	Island	1.67193e-07
cg09563120	-0.0262817	0.974061	10	102819893	KAZALD1	TSS1500	N_Shore	1.66266e-05
cg09620254	0.0618679	1.06382	19	2427979	TIMM13	TSS200	Island	4.88577e-06
cg09681335	-0.0284041	0.971995	6	74233510	NA	NA	Island	1.71191e-05
cg09795588	-0.0280142	0.972375	10	23479993	PTF1A	TSS1500	N_Shore	9.35446e-08
cg09876651	-0.0262551	0.974087	12	81331078	MIR618;LIN7A	TSS1500;Body	Island	3.29204e-07
cg09922770	-0.0262324	0.974109	19	46196180	QPCTL;SNRPD2;SNRPD2;QPCTL	Body;TSS1500;TSS1500;Body	Island	2.02273e-05
cg10004990	-0.0316953	0.968802	20	25052739	VSX1;VSX1;VSX1;VSX1	Body;Body;Body;Body	NA	1.12571e-06
cg10014408	-0.0267016	0.973652	9	139305226	PMPCA;PMPCA;SDCCAG3;SDCCAG3;SDCCAG3;PMPCA	5'UTR;5'UTR;TSS200;TSS200;TSS200;Body	Island	8.54557e-06
cg10031614	-0.0251274	0.975186	4	81187601	FGF5;FGF5	TSS200;TSS200	Island	7.71122e-08
cg10205334	-0.0197402	0.980453	10	89622497	PTEN;KILLIN;KILLIN	TSS1500;1stExon;5'UTR	Island	1.37515e-09
cg10211877	-0.0199086	0.980288	20	30539733	PDRG1	1stExon	Island	6.97407e-07
cg10228777	-0.0177678	0.982389	1	14925424	KIAA1026;KIAA1026;KIAA1026;KIAA1026	1stExon;5'UTR;1stExon;5'UTR	Island	1.39878e-05
cg10252086	-0.0181972	0.981967	19	5719823	TMEM146;LONP1	TSS1500;1stExon	Island	7.08147e-06
cg10290700	-0.0233257	0.976944	10	3110631	PFKP;PFKP	TSS200;Body	Island	3.88336e-07
cg10309613	-0.0294955	0.970935	21	34602084	IFNAR2;IFNAR2;IFNAR2;IFNAR2;IFNAR2;IFNAR2	TSS200;TSS200;TSS200;TSS200;TSS200;TSS200	N_Shore	1.35206e-06
cg10359929	-0.021671	0.978562	2	227663721	IRS1	TSS1500	Island	3.91134e-06
cg10453230	-0.0249029	0.975405	5	174148198	NA	NA	Island	1.90885e-05
cg10570014	0.0297481	1.03019	15	91643381	SV2B;SV2B;SV2B	1stExon;TSS200;5'UTR	Island	1.65809e-05
cg10578265	-0.026795	0.973561	16	67700832	C16orf86;C16orf86;ENKD1	5'UTR;1stExon;TSS1500	Island	4.02344e-06
cg10595952	-0.0304252	0.970033	5	2097052	NA	NA	NA	2.09428e-06
cg10751131	0.026223	1.02657	1	113258048	PPM1J	TSS200	Island	7.42748e-06
cg10841673	0.0361211	1.03678	20	49575318	MOCS3;DPM1	TSS200;TSS1500	Island	1.5606e-06
cg10872447	-0.0259141	0.974419	13	45694593	GTF2F2	TSS200	Island	2.09063e-05
cg11392012	0.042691	1.04362	12	52241946	NA	NA	Island	2.65289e-08
cg11513352	-0.01794	0.98222	16	30022537	DOC2A;DOC2A;DOC2A;DOC2A;DOC2A;DOC2A	5'UTR;5'UTR;5'UTR;TSS200;TSS200;TSS200	N_Shore	1.7907e-06
cg11687406	-0.0276068	0.972771	20	10199434	SNAP25;SNAP25	TSS200;TSS200	N_Shore	6.20896e-08
cg11710924	-0.0228014	0.977457	2	32503219	YIPF4;YIPF4	5'UTR;1stExon	Island	5.14939e-08
cg11793701	-0.0196146	0.980576	2	206547163	NRP2;NRP2;NRP2;NRP2;NRP2;NRP2	TSS200;TSS200;TSS200;TSS200;TSS200;TSS200	Island	2.39798e-06
cg11845111	0.0335046	1.03407	2	191398756	TMEM194B	Body	N_Shore	6.26353e-07
cg11951961	-0.0215452	0.978685	8	33370012	C8orf41;C8orf41	1stExon;Body	N_Shore	1.55774e-05
cg12066118	-0.0189642	0.981214	10	131934732	GLRX3	1stExon	Island	1.78446e-06
cg12146178	-0.0154778	0.984641	18	51795762	POLI	TSS200	Island	1.02079e-05
cg12262427	-0.0153832	0.984735	7	77166345	PTPN12;PTPN12;PTPN12	TSS1500;TSS1500;TSS1500	N_Shore	5.6459e-06
cg12333398	-0.0217011	0.978533	5	139028154	CXXC5	TSS200	Island	1.15397e-05
cg12353365	0.0356375	1.03628	1	231473965	SPRTN;SPRTN;SPRTN;SPRTN;SPRTN;SPRTN;EXOC8	5'UTR;5'UTR;5'UTR;1stExon;1stExon;1stExon;TSS1500	Island	1.95541e-05
cg12474691	-0.0196887	0.980504	1	156384160	C1orf61	Body	NA	3.26396e-06
cg12505443	-0.0212352	0.978989	4	48271918	TEC	TSS200	N_Shore	1.91615e-05
cg12518442	-0.01519	0.984925	20	55841906	BMP7	TSS200	S_Shore	1.42145e-05
cg12552766	-0.0228412	0.977418	13	60971347	TDRD3;TDRD3;TDRD3	5'UTR;5'UTR;TSS200	Island	2.46683e-06
cg12612947	-0.0380779	0.962638	3	25706262	TOP2B	TSS1500	Island	1.76108e-05
cg12684684	-0.0254486	0.974873	2	219082027	ARPC2;ARPC2	TSS200;5'UTR	Island	2.29435e-07
cg12855166	-0.018887	0.98129	17	30846586	MYO1D	Body	Island	1.9782e-05
cg12859382	0.0370289	1.03772	3	52445103	PHF7;PHF7;PHF7;BAP1;PHF7	1stExon;5'UTR;5'UTR;TSS1500;1stExon	Island	3.34567e-06
cg12880250	0.0383977	1.03914	17	43210016	ACBD4;ACBD4;PLCD3	5'UTR;1stExon;TSS200	Island	1.38133e-07
cg12980798	0.0112694	1.01133	7	124821777	NA	NA	NA	1.83767e-06
cg13044223	-0.0317361	0.968762	1	45240849	SNORD55;SNORD46;RPS8	TSS1500;TSS1500;TSS1500	N_Shore	1.59244e-05
cg13062819	0.0327509	1.03329	17	56428420	BZRAP1-AS1;BZRAP1-AS1;BZRAP1-AS1;BZRAP1-AS1;BZRAP1-AS1;BZRAP1-AS1;BZRAP1-AS1;BZRAP1-AS1;BZRAP1-AS1;SUPT4H1;SUPT4H1	Body;Body;Body;Body;Body;Body;Body;Body;Body;Body;Body	N_Shore	3.10705e-07
cg13198269	-0.01726	0.982888	1	202927637	ADIPOR1;ADIPOR1;ADIPOR1	1stExon;TSS200;5'UTR	S_Shore	7.96313e-06
cg13282635	-0.0193155	0.98087	16	3767729	TRAP1;TRAP1	TSS200;TSS200	Island	1.99186e-05
cg13334650	-0.0286927	0.971715	11	6440065	APBB1;APBB1	5'UTR;5'UTR	Island	8.68459e-06
cg13455700	-0.0235706	0.976705	11	122753504	C11orf63;C11orf63;C11orf63;C11orf63	1stExon;5'UTR;5'UTR;1stExon	Island	2.36721e-08
cg13459361	-0.0251123	0.9752	13	76111980	COMMD6;COMMD6;COMMD6;COMMD6	5'UTR;1stExon;5'UTR;1stExon	Island	2.13977e-05
cg13478228	-0.0311169	0.969362	18	70209432	CBLN2	5'UTR	Island	9.06584e-08
cg13485052	-0.0211009	0.97912	3	130745651	NEK11;NEK11;NEK11;ASTE1	TSS200;TSS200;TSS200;TSS200	Island	6.68019e-06
cg13630845	-0.0157466	0.984377	19	16682861	SLC35E1	1stExon	Island	3.06309e-06
cg13635455	-0.0241463	0.976143	14	91731012	NA	NA	Island	5.52853e-06
cg13692482	-0.133382	0.875131	9	130168651	SLC2A8	Body	S_Shore	2.35489e-06
cg13699355	-0.0165069	0.983629	2	468179	NA	NA	Island	1.13087e-05
cg13709765	0.0218949	1.02214	18	3451484	TGIF1;TGIF1;TGIF1;TGIF1;TGIF1;TGIF1;TGIF1	5'UTR;Body;Body;5'UTR;TSS200;Body;TSS200	Island	2.79767e-07
cg13747555	-0.022543	0.977709	9	101018059	TBC1D2	TSS200	Island	1.66016e-05
cg13751257	0.0627961	1.06481	19	17405237	ABHD8	Body	Island	8.4927e-06
cg13910573	0.0338258	1.0344	9	116163406	ALAD	5'UTR	Island	2.14253e-05
cg14008862	-0.0255489	0.974775	17	28927542	LRRC37B2	Body	Island	1.14847e-06
cg14015920	0.0395224	1.04031	1	23346770	KDM1A;KDM1A	Body;Body	S_Shore	5.84816e-06
cg14093065	0.0332719	1.03383	17	1811625	NA	NA	Island	4.33874e-08
cg14093570	-0.0214526	0.978776	1	16679143	FBXO42	TSS200	Island	8.30605e-06
cg14168923	-0.0163364	0.983796	13	28366606	GSX1	TSS200	Island	1.21193e-05
cg14177917	-0.0182299	0.981935	2	129076063	HS6ST1	1stExon	Island	1.00115e-05
cg14254396	-0.0180837	0.982079	19	5294252	PTPRS;PTPRS;PTPRS;PTPRS	5'UTR;5'UTR;5'UTR;5'UTR	S_Shore	6.74936e-06
cg14272822	-0.0187621	0.981413	9	98279166	PTCH1;PTCH1;PTCH1;PTCH1	1stExon;5'UTR;5'UTR;1stExon	Island	9.89677e-07
cg14328497	-0.0197992	0.980396	16	5148769	EEF2KMT;EEF2KMT;EEF2KMT	TSS1500;TSS1500;TSS1500	Island	6.38802e-06
cg14330283	0.0436088	1.04457	19	38147197	ZFP30	TSS1500	Island	1.1237e-05
cg14417372	-0.0303636	0.970093	11	119455230	NA	NA	Island	6.45871e-06
cg14489817	-0.0290121	0.971405	15	89164522	AEN	TSS200	Island	1.50953e-05
cg14592024	-0.0266748	0.973678	15	48624386	DUT;DUT;DUT;DUT	5'UTR;1stExon;Body;5'UTR	Island	1.2946e-05
cg14610915	-0.0181153	0.982048	17	75243296	NA	NA	Island	5.55405e-06
cg14694176	-0.017826	0.982332	8	54935016	TCEA1;TCEA1;TCEA1;TCEA1	TSS200;TSS200;TSS200;TSS200	Island	2.85406e-06
cg14708875	-0.0166077	0.983529	7	100209945	MOSPD3;MOSPD3;MOSPD3;MOSPD3	TSS200;TSS200;TSS200;5'UTR	Island	1.34147e-05
cg14717632	-0.0251364	0.975177	1	16679137	FBXO42	TSS200	Island	1.0185e-05
cg14717725	0.0250841	1.0254	11	129620945	NA	NA	NA	6.62286e-06
cg14775560	-0.040922	0.959904	11	49230168	FOLH1;FOLH1;FOLH1;FOLH1	1stExon;5'UTR;1stExon;5'UTR	S_Shore	5.65107e-06
cg14812448	0.0203622	1.02057	2	62081812	FAM161A	TSS1500	S_Shore	8.71642e-06
cg14870673	-0.0211223	0.979099	2	97481843	CNNM3;CNNM3	TSS200;TSS200	Island	4.39911e-06
cg14875014	-0.0219434	0.978296	2	234262710	DGKD	TSS1500	NA	2.17765e-05
cg14880228	-0.0304771	0.969983	2	120302126	PCDP1	5'UTR	Island	4.28186e-06
cg14908548	0.0357043	1.03635	5	179159589	MAML1	TSS1500	Island	3.54318e-06
cg14963534	-0.0124915	0.987586	19	17420130	DDA1	TSS1500	N_Shore	1.83237e-05
cg14985481	0.0396362	1.04043	19	10691854	AP1M2	Body	Island	1.01499e-06
cg15044280	-0.0219219	0.978317	9	14347289	NFIB	Body	Island	3.6343e-06
cg15069906	-0.0276007	0.972777	20	55841888	BMP7	TSS200	S_Shore	5.08e-06
cg15092544	-0.0196919	0.980501	12	69004670	RAP1B;RAP1B;RAP1B;RAP1B;RAP1B;RAP1B;RAP1B;RAP1B;RAP1B;RAP1B;RAP1B;RAP1B	1stExon;1stExon;1stExon;1stExon;1stExon;1stExon;5'UTR;5'UTR;5'UTR;5'UTR;5'UTR;5'UTR	Island	1.93372e-05
cg15124455	0.0438842	1.04486	1	94312690	BCAR3;BCAR3	1stExon;5'UTR	Island	1.86166e-06
cg15433604	-0.0143383	0.985764	19	18942513	UPF1	TSS1500	Island	4.60904e-06
cg15479427	0.0130676	1.01315	15	25438173	SNORD115-13	TSS1500	NA	1.50904e-05
cg15617297	-0.016458	0.983677	10	81965460	ANXA11;ANXA11;ANXA11	TSS200;TSS200;TSS200	Island	1.2507e-05
cg15685006	0.0311612	1.03165	8	11413043	BLK	Body	NA	1.5364e-07
cg15701178	0.0433023	1.04425	4	96471143	UNC5C	TSS1500	S_Shore	2.25413e-06
cg15760257	-0.0227484	0.977508	17	26699169	SARM1	1stExon	Island	1.17629e-05
cg15764133	0.0195815	1.01977	9	104295808	RNF20	TSS1500	N_Shore	7.64331e-06
cg15878435	-0.0181728	0.981991	14	65171311	PLEKHG3;PLEKHG3	1stExon;5'UTR	Island	2.26721e-08
cg16062518	-0.0211629	0.97906	19	42928239	LIPE;LIPE-AS1;LIPE-AS1	Body;Body;Body	Island	1.52429e-05
cg16139685	0.0356088	1.03625	6	18328085	NA	NA	NA	6.6535e-06
cg16174680	-0.0212045	0.979019	8	41504078	NKX6-3	Body	Island	1.85664e-05
cg16215402	-0.0477448	0.953377	10	131265405	MGMT	TSS200	Island	1.72259e-05
cg16268051	-0.0185956	0.981576	1	22379390	CDC42;CDC42;CDC42	5'UTR;5'UTR;5'UTR	Island	2.10439e-05
cg16396228	-0.0495493	0.951658	17	46985589	UBE2Z	TSS200	Island	3.06145e-06
cg16410464	-0.0222349	0.978011	7	65215907	CCT6P1	TSS200	Island	1.16742e-07
cg16513685	0.0807873	1.08414	9	33738831	LINC01251	TSS1500	NA	6.30849e-07
cg16520238	-0.0202172	0.979986	17	45798480	NA	NA	NA	4.40884e-06
cg16725264	-0.0187313	0.981443	8	145582147	FBXL6;GPR172A;FBXL6	TSS200;TSS200;TSS200	Island	2.29477e-06
cg16885608	0.0509479	1.05227	19	37019262	ZNF260;ZNF260;ZNF260;ZNF260	TSS200;TSS200;TSS200;TSS200	Island	1.89378e-07
cg16890428	0.0235783	1.02386	19	55866412	FAM71E2;COX6B2	3'UTR;TSS1500	S_Shore	1.68783e-05
cg16937333	0.0350335	1.03565	4	468201	ABCA11P;ZNF721	TSS1500;5'UTR	S_Shore	3.26613e-08
cg17030841	-0.0166678	0.98347	2	240323363	HDAC4	TSS1500	Island	1.30943e-05
cg17057783	-0.0290788	0.97134	11	57283183	SLC43A1	TSS200	Island	1.2707e-06
cg17105358	-0.0195592	0.980631	1	162531703	UAP1	5'UTR	Island	1.28608e-05
cg17172593	0.0198185	1.02002	17	1530856	SLC43A2	Body	N_Shore	6.47614e-09
cg17215843	-0.0162229	0.983908	4	89513558	HERC3	TSS200	Island	1.9945e-05
cg17397592	-0.0273103	0.973059	2	237416338	IQCA1	TSS1500	Island	6.91985e-08
cg17411103	-0.0155014	0.984618	17	65241599	HELZ	TSS1500	Island	6.82981e-07
cg17553389	-0.0158237	0.984301	17	66243667	AMZ2;AMZ2;AMZ2;AMZ2;AMZ2;AMZ2	TSS1500;TSS1500;TSS1500;TSS1500;TSS1500;TSS1500	Island	1.02165e-05
cg17698665	-0.020005	0.980194	5	1887536	IRX4;IRX4;IRX4;IRX4;CTD-2194D22.4	TSS1500;TSS1500;TSS1500;TSS1500;Body	Island	1.96072e-05
cg17750334	-0.0315328	0.968959	1	214776613	CENPF;CENPF	1stExon;5'UTR	Island	4.38948e-06
cg17922329	-0.0230757	0.977189	19	35646039	FXYD5;FXYD5;FXYD5;FXYD5	5'UTR;5'UTR;Body;5'UTR	Island	1.48369e-05
cg17958315	-0.0232505	0.977018	5	127873552	FBN2;FBN2	1stExon;5'UTR	Island	4.91977e-06
cg18045575	-0.0138138	0.986281	2	27341901	CGREF1;CGREF1;CGREF1;CGREF1;CGREF1	5'UTR;TSS200;1stExon;1stExon;5'UTR	Island	2.13488e-05
cg18202349	-0.0201556	0.980046	22	50970230	ODF3B	Body	Island	8.20448e-06
cg18270617	-0.0218721	0.978365	7	141251022	AGK	TSS200	Island	1.65328e-06
cg18308176	-0.0259404	0.974393	2	242786266	NA	NA	Island	4.63077e-06
cg18313583	-0.0206751	0.979537	1	235490745	GGPS1;GGPS1;ARID4B;GGPS1;ARID4B	TSS1500;TSS1500;5'UTR;TSS1500;5'UTR	Island	4.73256e-06
cg18458993	-0.0163587	0.983774	14	68086576	ARG2	TSS200	Island	5.08459e-06
cg18480477	-0.0308805	0.969591	18	8882723	NA	NA	NA	1.01321e-05
cg18519927	-0.0196413	0.98055	18	20715404	CABLES1;CABLES1	TSS1500;Body	Island	6.42228e-07
cg18561899	-0.0147993	0.98531	14	53162556	ERO1L	TSS200	Island	2.03112e-06
cg18643902	-0.0183093	0.981857	11	67888930	CHKA;CHKA	TSS200;TSS200	Island	9.68458e-07
cg18873763	0.038638	1.03939	6	151671523	AKAP12;AKAP12	Body;Body	NA	1.89911e-05
cg19041132	-0.0134096	0.98668	17	74380824	SPHK1;SPHK1;SPHK1;SPHK1;SPHK1;SPHK1;SPHK1	5'UTR;1stExon;1stExon;1stExon;5'UTR;5'UTR;TSS1500	Island	1.34989e-05
cg19094126	-0.0183088	0.981858	13	30881323	KATNAL1;KATNAL1	TSS200;5'UTR	Island	1.12753e-05
cg19110428	-0.036432	0.964224	20	30324912	NA	NA	N_Shelf	1.52829e-07
cg19175649	-0.0241314	0.976157	17	15164120	PMP22;PMP22;PMP22	5'UTR;5'UTR;TSS200	Island	4.17996e-06
cg19214222	-0.0255893	0.974735	4	147867081	TTC29	TSS200	Island	1.02423e-05
cg19310303	-0.0170943	0.983051	19	40854424	C19orf47;PLD3;PLD3;PLD3;PLD3	TSS200;5'UTR;5'UTR;1stExon;1stExon	Island	1.61325e-05
cg19407717	-0.0295902	0.970843	2	1544120	TPO;TPO;TPO;TPO	Body;Body;Body;Body	N_Shore	2.19654e-05
cg19430391	-0.0217215	0.978513	17	21360529	NA	NA	NA	1.35636e-05
cg19486585	-0.018227	0.981938	2	109151054	NA	NA	Island	1.10924e-05
cg19494762	-0.0188161	0.98136	3	184279498	EPHB3	TSS200	Island	8.61663e-06
cg19585003	-0.0325829	0.967942	12	112280177	C12orf47;MAPKAPK5;MAPKAPK5	Body;TSS200;TSS200	Island	3.08884e-06
cg19708576	-0.0234966	0.976777	6	44214097	HSP90AB1	TSS1500	Island	1.49541e-05
cg19740341	0.0275036	1.02789	8	20693391	NA	NA	NA	3.22017e-06
cg19826211	-0.029131	0.971289	10	30348638	KIAA1462	TSS200	S_Shore	1.36825e-05
cg20011974	0.0336184	1.03419	14	75469661	EIF2B2;EIF2B2	1stExon;5'UTR	Island	6.05739e-06
cg20071498	-0.0167575	0.983382	8	33342594	MAK16	TSS200	Island	1.30921e-06
cg20173897	-0.0232574	0.977011	9	108006796	SLC44A1;SLC44A1	TSS200;TSS200	Island	1.11506e-05
cg20295040	0.0587425	1.0605	1	192778396	RGS2	Body	S_Shore	8.34229e-08
cg20340405	0.00784666	1.00788	12	27848254	PPFIBP1;PPFIBP1;PPFIBP1;PPFIBP1;REP15	3'UTR;3'UTR;3'UTR;3'UTR;TSS1500	NA	7.86622e-06
cg20455131	-0.0167874	0.983353	3	113666584	ZDHHC23	TSS200	Island	1.98948e-06
cg20478129	-0.0251387	0.975175	14	27067372	NOVA1;NOVA1;NOVA1	TSS1500;TSS1500;TSS1500	S_Shore	1.15415e-07
cg20655113	-0.0264344	0.973912	6	134638881	SGK1;SGK1	1stExon;5'UTR	Island	1.87536e-06
cg20720059	-0.0184014	0.981767	2	14772731	FAM84A	TSS200	Island	1.04882e-05
cg21112440	-0.0196292	0.980562	12	48744082	ZNF641	TSS200	N_Shore	1.71881e-05
cg21162026	-0.0198451	0.980351	6	52285038	EFHC1;EFHC1;EFHC1;EFHC1	TSS1500;5'UTR;1stExon;Body	Island	4.43405e-07
cg21401746	-0.0342338	0.966346	15	49170042	SHC4;EID1	Body;TSS1500	N_Shore	5.81092e-06
cg21409519	-0.0287363	0.971673	1	11822153	NA	NA	Island	3.50144e-06
cg21530045	-0.0264407	0.973906	6	150263035	ULBP2	TSS200	Island	3.61446e-09
cg21881074	-0.020119	0.980082	11	3013801	NAP1L4	TSS200	Island	2.03402e-08
cg21978493	-0.022619	0.977635	6	5261373	FARS2;LYRM4;LYRM4;LYRM4;LYRM4;LYRM4	TSS1500;TSS200;TSS200;TSS200;TSS200;TSS200	Island	1.33044e-05
cg22117893	-0.0820728	0.921205	13	114212078	NA	NA	N_Shelf	2.13693e-06
cg22139271	-0.0295886	0.970845	8	11725596	CTSB;CTSB;CTSB;CTSB;CTSB;CTSB;CTSB;CTSB;CTSB;CTSB	1stExon;1stExon;5'UTR;5'UTR;5'UTR;5'UTR;1stExon;1stExon;1stExon;5'UTR	Island	5.36318e-06
cg22204479	-0.0169488	0.983194	20	21378227	NKX2-4	TSS200	Island	2.17202e-05
cg22364869	-0.0230535	0.97721	1	7740271	CAMTA1	Body	Island	1.8378e-06
cg22468666	0.024447	1.02475	6	28327499	ZKSCAN3	Body	NA	4.21298e-06
cg22523852	0.0458064	1.04687	15	27112049	GABRA5;GABRA5;GABRA5	5'UTR;TSS1500;1stExon	Island	1.00635e-06
cg22587327	-0.0231786	0.977088	2	71357290	MCEE;MPHOSPH10	Body;TSS200	Island	6.42129e-06
cg22626663	-0.0192526	0.980932	17	4870301	SPAG7	Body	Island	3.7779e-06
cg22663872	-0.0187696	0.981405	7	149120266	NA	NA	Island	1.69097e-05
cg22675162	0.0623397	1.06432	2	70520975	SNRPG	TSS200	Island	1.43822e-05
cg22756555	-0.0313154	0.96917	2	162017219	TANK;TANK	5'UTR;5'UTR	Island	8.4784e-06
cg22794378	-0.0228959	0.977364	14	89029563	ZC3H14;ZC3H14;ZC3H14;ZC3H14;ZC3H14	TSS200;Body;Body;Body;Body	Island	1.10469e-05
cg23035638	0.0181495	1.01832	19	38035880	NA	NA	N_Shelf	1.455e-06
cg23066318	0.0629621	1.06499	17	36860967	MLLT6	TSS1500	Island	8.752e-06
cg23143502	-0.0633469	0.938618	4	675936	MFSD7	Body	Island	3.64328e-07
cg23329073	-0.0238826	0.9764	17	81038827	METRNL	Body	Island	2.88303e-06
cg23401624	-0.0237514	0.976528	19	10305755	DNMT1;DNMT1	TSS200;TSS200	Island	2.41778e-06
cg23434186	-0.0217513	0.978484	18	67068730	DOK6	Body	Island	1.36047e-05
cg23508333	-0.0202712	0.979933	21	36261071	RUNX1;RUNX1;RUNX1	TSS200;TSS200;Body	Island	1.93416e-05
cg23515942	-0.0237278	0.976551	3	50359019	HYAL2;HYAL2	TSS200;5'UTR	Island	2.15439e-05
cg23536921	-0.0287615	0.971648	3	49824151	IP6K1;IP6K1	TSS200;TSS200	Island	2.96361e-06
cg23537959	-0.0166667	0.983471	5	63461570	RNF180;RNF180	TSS200;TSS200	Island	1.16407e-05
cg23543615	-0.0197491	0.980445	19	19281185	LOC729991-MEF2B;LOC729991-MEF2B;MEF2B;LOC729991-MEF2B	Body;5'UTR;TSS200;Body	Island	1.93827e-08
cg23549086	-0.026702	0.973651	19	8008681	TIMM44	TSS200	Island	1.12183e-05
cg23560756	-0.0238918	0.976391	11	93862073	PANX1	TSS200	Island	1.38203e-06
cg23568552	0.0365647	1.03724	17	73105988	ARMC7	TSS200	Island	2.38791e-06
cg23709224	-0.0291563	0.971265	11	6495078	TRIM3;TRIM3;TRIM3;TRIM3;TRIM3;TRIM3;TRIM3	1stExon;1stExon;1stExon;5'UTR;5'UTR;5'UTR;5'UTR	Island	1.33924e-05
cg23754431	-0.0218943	0.978344	11	69258364	NA	NA	Island	4.1731e-06
cg23774356	-0.0153215	0.984795	22	19137874	GSC2	TSS200	Island	1.31864e-06
cg23807890	-0.0199558	0.980242	2	228736357	WDR69;WDR69	1stExon;5'UTR	Island	1.19265e-05
cg23860886	-0.0249306	0.975378	6	18155593	KDM1B;TPMT	TSS200;TSS1500	Island	1.59517e-05
cg23949612	-0.0224183	0.977831	12	70636659	CNOT2	TSS200	Island	1.32423e-05
cg24160810	0.0294644	1.0299	7	41124212	NA	NA	NA	6.9525e-07
cg24397040	-0.0199216	0.980275	21	45138847	PDXK	TSS200	Island	1.69033e-06
cg24422027	-0.0190661	0.981115	17	2659305	NA	NA	Island	1.53544e-05
cg24775108	-0.0221404	0.978103	14	58666607	ACTR10	TSS1500	Island	9.07126e-06
cg24869601	-0.0269517	0.973408	6	10414350	TFAP2A;TFAP2A	Body;Body	Island	9.45746e-06
cg24976104	-0.0248626	0.975444	22	45097940	PRR5;PRR5-ARHGAP8;PRR5;PRR5;PRR5;PRR5	5'UTR;TSS1500;TSS200;5'UTR;5'UTR;5'UTR	Island	7.46038e-06
cg25046033	-0.0287388	0.97167	8	75027367	NA	NA	NA	1.93494e-05
cg25104522	-0.0202293	0.979974	22	38004754	GGA1;GGA1;GGA1;GGA1;GGA1;GGA1;GGA1	TSS1500;5'UTR;5'UTR;5'UTR;1stExon;1stExon;1stExon	Island	1.73415e-05
cg25145905	-0.0364139	0.964241	3	9975420	CRELD1;CRELD1;CRELD1	TSS200;TSS200;TSS200	Island	2.51408e-11
cg25152348	-0.0187027	0.981471	22	50946712	NCAPH2;LMF2;NCAPH2;NCAPH2;NCAPH2	1stExon;TSS1500;5'UTR;5'UTR;1stExon	Island	7.78579e-06
cg25189429	-0.0168149	0.983326	13	21277706	IL17D	5'UTR	Island	5.58635e-06
cg25206134	0.0465373	1.04764	2	45395956	NA	NA	Island	6.62497e-06
cg25496828	-0.021358	0.978869	14	23776075	BCL2L2-PABPN1;BCL2L2;BCL2L2-PABPN1;BCL2L2;BCL2L2;BCL2L2	1stExon;1stExon;5'UTR;5'UTR;1stExon;5'UTR	NA	1.1633e-06
cg25548615	-0.0265071	0.973841	4	2011379	WHSC2	TSS1500	Island	7.30601e-06
cg25570278	-0.0161963	0.983934	14	23306509	MMP14	Body	Island	1.32314e-05
cg25598759	-0.021375	0.978852	6	30294980	HCG18;TRIM39;HCG18;TRIM39	TSS200;5'UTR;TSS200;TSS200	Island	1.57915e-06
cg25766537	-0.0221106	0.978132	1	168147996	TIPRL;TIPRL	TSS200;TSS200	Island	8.01309e-07
cg25768103	-0.0209462	0.979272	19	19174831	SLC25A42;SLC25A42	1stExon;5'UTR	Island	5.11157e-08
cg25783997	-0.0581356	0.943522	2	185462928	ZNF804A	TSS200	N_Shore	7.21485e-06
cg25904166	-0.0420614	0.958811	15	92044177	NA	NA	NA	5.43313e-06
cg26028074	0.117964	1.1252	17	32201533	ASIC2	Body	NA	1.39195e-06
cg26053083	0.0609254	1.06282	11	14995770	NA	NA	Island	2.1897e-05
cg26266703	-0.012412	0.987665	8	144699630	TSTA3	5'UTR	Island	2.01651e-05
cg26331160	-0.0279242	0.972462	1	2706298	TTC34	TSS200	Island	5.30423e-07
cg26343667	-0.0243225	0.975971	3	156391915	TIPARP;LOC100287227	TSS1500;Body	Island	1.13122e-05
cg26380756	-0.0194881	0.980701	22	39097154	JOSD1	TSS1500	Island	6.96249e-06
cg26614816	-0.0219439	0.978295	12	104697532	TXNRD1;TXNRD1;TXNRD1;EID3;TXNRD1;TXNRD1	5'UTR;5'UTR;Body;TSS200;Body;5'UTR	Island	1.04166e-08
cg26649993	-0.0184527	0.981716	9	124062088	GSN;GSN;GSN;GSN;GSN;GSN;GSN;GSN;GSN;GSN;GSN	5'UTR;1stExon;5'UTR;5'UTR;5'UTR;5'UTR;5'UTR;5'UTR;Body;Body;Body	Island	1.49399e-05
cg26675182	0.0152178	1.01533	7	2405750	EIF3B;EIF3B	Body;Body	NA	5.94786e-07
cg26676092	-0.0648317	0.937225	15	58661605	NA	NA	NA	7.51097e-07
cg26719549	0.0338753	1.03446	12	76742285	BBS10	TSS200	Island	8.61378e-06
cg26775087	0.0131852	1.01327	3	15382808	SH3BP5;SH3BP5	1stExon;5'UTR	NA	1.23949e-05
cg26811061	-0.0203847	0.979822	11	66056587	YIF1A;YIF1A	1stExon;5'UTR	Island	7.39101e-09
cg26811653	0.05476	1.05629	15	65321545	MTFMT	Body	Island	1.43021e-05
cg26869920	0.0465694	1.04767	6	53528893	KLHL31	5'UTR	NA	6.2933e-06
cg26938597	-0.0209725	0.979246	18	44778021	NA	NA	Island	8.74911e-06
cg27048624	-0.0275267	0.972849	16	30886611	MIR762HG;MIR762HG;MIR762HG;MIR4519;BCL7C	TSS200;TSS200;TSS200;Body;Body	Island	3.93935e-06
cg27106230	-0.0296646	0.970771	13	99229068	STK24;STK24	1stExon;5'UTR	Island	2.93978e-06
cg27118059	-0.0196882	0.980504	21	32931471	TIAM1	TSS200	Island	1.96129e-06
cg27194727	0.0278622	1.02825	6	107453066	NA	NA	NA	6.54308e-06
cg27205810	-0.022614	0.97764	9	33290416	NFX1;NFX1;NFX1	TSS200;TSS200;TSS200	Island	1.65511e-05
cg27261916	-0.0154487	0.98467	11	82782540	RAB30-AS1;RAB30;RAB30;RAB30	TSS1500;TSS200;5'UTR;5'UTR	NA	1.53155e-05
cg27298570	0.029722	1.03017	16	8623004	TMEM114	TSS1500	S_Shelf	2.0309e-05
cg27425996	-0.0191684	0.981014	7	51383344	COBL	Body	Island	2.09437e-05
cg27485194	-0.0190259	0.981154	8	101322518	RNF19A	TSS200	Island	3.81256e-06
cg27488751	-0.0245981	0.975702	21	43916608	RSPH1	TSS1500	Island	2.37528e-07
cg27508175	-0.0250268	0.975284	5	95297800	ELL2;LOC101929710	TSS200;Body	S_Shore	3.62691e-06
cg27549166	-0.023498	0.976776	12	110437645	ANKRD13A	Body	Island	1.29143e-05
